1 **Brain/MINDS Beyond Human Brain MRI Project: A Protocol for Multi-Site**

2 **Harmonization across Brain Disorders Throughout the Lifespan**

3 Running Head: Brain/MINDS Beyond MRI study

4  
5 Shinsuke Koike, M.D., Ph.D.<sup>1,2,3,4</sup>; Saori C Tanaka, Ph.D.<sup>5</sup>; Tomohisa Okada, M.D., Ph.D.<sup>6</sup>;  
6 Toshihiko Aso, M.D., Ph.D.<sup>7</sup>; Michiko Asano, Ph.D.<sup>1</sup>; Norihide Maikusa, Ph.D.<sup>1,8</sup>; Kentaro  
7 Morita, M.D., Ph.D.<sup>9</sup>; Naohiro Okada, M.D., Ph.D.<sup>2,4,10</sup>; Masaki Fukunaga, Ph.D.<sup>11</sup>; Akiko  
8 Uematsu, Ph.D.<sup>1</sup>; Hiroki Togo, MSc.<sup>8</sup>; Atsushi Miyazaki, Ph.D.<sup>12</sup>; Katsutoshi Murata, MSc.<sup>13</sup>;  
9 Yuta Urushibata, MSc.<sup>13</sup>; Joonas Autio, Ph.D.<sup>7</sup>; Takayuki Ose, MSc.<sup>7</sup>; Junichiro Yoshimoto,  
10 Ph.D.<sup>5</sup>; Toshiyuki Araki, M.D., Ph.D.<sup>14</sup>; Matthew F Glasser, M.D., Ph.D.<sup>15,16</sup>; David C Van  
11 Essen, Ph.D.<sup>15</sup>; Megumi Maruyama, Ph.D.<sup>17</sup>; Norihiro Sadato, M.D., Ph.D.<sup>11</sup>; Mitsuo Kawato,  
12 Ph.D.<sup>5,18</sup>; Kiyoto Kasai, M.D., Ph.D.<sup>2,3,4,10</sup>; Yasumasa Okamoto, M.D., Ph.D.<sup>19</sup>; Takashi  
13 Hanakawa, M.D., Ph.D.<sup>8,20</sup>; Takuya Hayashi, M.D., Ph.D.<sup>7</sup>; Brain/MINDS Beyond Human Brain  
14 MRI Group

15  
16 1) Center for Evolutionary Cognitive Sciences (ECS), Graduate School of Art and Sciences, The  
17 University of Tokyo, Meguro-ku, Tokyo 153-8902, Japan

18 2) University of Tokyo Institute for Diversity & Adaptation of Human Mind (UTIDAHM),  
19 Meguro-ku, Tokyo 153-8902, Japan

20 3) University of Tokyo Center for Integrative Science of Human Behavior (CiSHuB), 3-8-1  
21 Komaba, Meguro-ku, Tokyo 153-8902, Japan

22 4) The International Research Center for Neurointelligence (WPI-IRCN), Institutes for  
23 Advanced Study (UTIAS), University of Tokyo, 7-3-1 Hongo, Bunkyo-ku, Tokyo 113-8654,  
24 Japan

25 5) Brain Information Communication Research Laboratory Group, Advanced  
26 Telecommunications Research Institutes International (ATR), Kyoto 619-0288, Japan

27 6) Human Brain Research Center, Kyoto University, Kyoto 606-8507, Japan

28 7) Laboratory for Brain Connectomics Imaging, RIKEN Center for Biosystems Dynamics  
29 Research, Hyogo 650-0047, Japan

30 8) Integrative Brain Imaging Center, National Center of Neurology and Psychiatry, Kodaira-shi,  
31 Tokyo 187-8551, Japan

32 9) Department of Rehabilitation, Graduate School of Medicine, The University of Tokyo,  
33 Bunkyo-ku, Tokyo 113-8655, Japan

34 10) Department of Neuropsychiatry, Graduate School of Medicine, The University of Tokyo,  
35 Bunkyo-ku, Tokyo 113-8655, Japan

36 11) Division of Cerebral Integration, Department of System Neuroscience, National Institute for  
37 Physiological Sciences, Okazaki 444-8585, Japan

38 12) Tamagawa University Brain Science Institute, 6-1-1 Tamagawagakuen, Machida, Tokyo  
39 194-8610, Japan

40 13) Siemens Healthcare K.K. Shinagawa-ku, Tokyo 141-8644, Japan

41 14) Department of Peripheral Nervous System Research, National Institute of Neuroscience,  
42 National Center of Neurology and Psychiatry, Kodaira, Tokyo 187-8551, Japan

43 15) Department of Neuroscience, Washington University School of Medicine, St Louis, Missouri  
44 USA

45 16) Department of Radiology, Washington University School of Medicine, St Louis, Missouri,  
46 USA

47 17) Research Enhancement Strategy Office, National Institute for Physiological Sciences,  
48 Okazaki 444-8585, Japan

49 18) Center for Advanced Intelligence Project, RIKEN, Tokyo 103-0027, Japan

50 19) Department of Psychiatry and Neurosciences, Hiroshima University, Hiroshima 734-8551,  
51 Japan

52 20) Department of Integrated Neuroanatomy and Neuroimaging, Kyoto University Graduate  
53 School of Medicine, Kyoto 606-8303, Japan

54

55 **Corresponding to:**

56 Takuya Hayashi, M.D., Ph.D.

57 Laboratory for Brain Connectomics Imaging,

58 RIKEN Center for Biosystems Dynamics Research

59 6-7-3 Minatojima-minami-machi, Chuo-ku, Kobe, Hyogo 650-0047

60 E-mail: [takuya.hayashi@riken.jp](mailto:takuya.hayashi@riken.jp)

61 Tel: +81-78-304-7140

62 Fax: +81-78-304-7141

63 **Abstract**

64 Psychiatric and neurological disorders are afflictions of the brain that can affect individuals  
65 throughout their lifespan. Many brain magnetic resonance imaging (MRI) studies have been  
66 conducted; however, imaging-based biomarkers are not yet well established for diagnostic and  
67 therapeutic use. This article describes an outline of the planned study, the Brain/MINDS Beyond  
68 human brain MRI project (FY2018 ~ FY2023), which aims to establish clinically-relevant  
69 imaging biomarkers with multi-site harmonization by collecting data from healthy traveling  
70 subjects (TS) at 13 research sites. Collection of data in psychiatric and neurological disorders  
71 across the lifespan is also scheduled at 13 sites, whereas designing measurement procedures,  
72 developing and analyzing neuroimaging protocols, and databasing are done at three research  
73 sites. The Harmonization protocol (HARP) was established for five high-quality 3T scanners to  
74 obtain multimodal brain images including T1 and T2-weighted, resting state and task functional  
75 and diffusion-weighted MRI. Data are preprocessed and analyzed using approaches developed  
76 by the Human Connectome Project. Preliminary results in 30 TS demonstrated cortical thickness,  
77 myelin, functional connectivity measures are comparable across 5 scanners, providing high  
78 reproducibility and sensitivity to subject-specific connectome. A total of 75 TS, as well as  
79 patients with various psychiatric and neurological disorders, are scheduled to participate in the  
80 project, allowing a mixed model statistical harmonization. The HARP protocols are publicly  
81 available online, and all the imaging, demographic and clinical information, harmonizing  
82 database will also be made available by 2024. To the best of our knowledge, this is the first  
83 project to implement a rigorous, prospective harmonization protocol with multi-site TS data. It  
84 explores intractable brain disorders across the lifespan and may help to identify the disease-  
85 specific pathophysiology and imaging biomarkers for clinical practice.

86  
87 **Keywords**

88 Multi-site Study; HCP-style Brain Imaging; Psychiatric Disorders; Neurological Disorders;  
89 Harmonization Protocol; Traveling Subjects

|     |                                                                                      |
|-----|--------------------------------------------------------------------------------------|
| 90  |                                                                                      |
| 91  | <b><u>Text</u></b>                                                                   |
| 92  | <b>Abbreviations</b>                                                                 |
| 93  | DALYs, disability-adjusted life years                                                |
| 94  | MRI, magnetic resonance imaging                                                      |
| 95  | HCP, Human Connectome Project                                                        |
| 96  | ABCD, Adolescent Brain Cognitive Development                                         |
| 97  | BPD, bipolar disorder                                                                |
| 98  | MDD, major depressive disorder                                                       |
| 99  | DecNef, Decoded Neurofeedback                                                        |
| 100 | ASD, autism spectrum disorder                                                        |
| 101 | ADNI, Alzheimer’s Disease Neuroimaging Initiative                                    |
| 102 | AD, Alzheimer’s disease                                                              |
| 103 | MCI, mild cognitive impairment                                                       |
| 104 | PPMI, Parkinson's Progression Markers Initiative                                     |
| 105 | PD, Parkinson’s disease                                                              |
| 106 | T1w, T1-weighted                                                                     |
| 107 | T2w, T2-weighted                                                                     |
| 108 | rsfMRI, resting state functional MRI                                                 |
| 109 | CRHD, Connectome Related to Human Disease                                            |
| 110 | GLM, general linear model                                                            |
| 111 | TS, traveling subject                                                                |
| 112 | AMED, Japan Agency for Medical Research and Development                              |
| 113 | Brain/MINDS Beyond, Strategic International Brain Science Research Promotion Program |
| 114 | HARP, Harmonization protocol                                                         |
| 115 | DWI, diffusion-weighted imaging                                                      |
| 116 | QC, quality control                                                                  |
| 117 | MNI, Montreal Neurological Institute                                                 |
| 118 | MSM, multi-modal surface matching                                                    |
| 119 | GLMM, general linear mixed model                                                     |
| 120 | CIFTI, Connectivity Informatics Technology Initiative                                |
| 121 | FEF, frontal eye field                                                               |
| 122 | PEF, premotor eye field                                                              |
| 123 | PSL, peri-sylvian language                                                           |
| 124 | STS, superior temporal sulcus                                                        |
| 125 | NODDI, nerite orientation and density imaging                                        |

## 126 **1. Introduction**

127 Psychiatric and neurological disorders are afflictions of the brain that can affect individuals  
128 throughout their lifespans. Using the disability-adjusted life years (DALYs), which is a measure  
129 of disease burden proposed by the World Health Organization Global Burden of Disease study,  
130 in 2010 mental and behavioral disorders accounted for 7.4% of the total DALYs and  
131 neurological disorders accounted for 3.0% (Murray et al., 2012), up from 5.4% and 1.9% in  
132 1990, respectively. Since the 1990s, technical advances in magnetic resonance imaging (MRI)  
133 have allowed detailed analysis of the organization of brain function and structure in humans.  
134 Recent high-quality MRI studies with a large cohort are expected to provide neurobiological and  
135 life-span information in healthy subjects (Glasser et al., 2016b; Harms et al., 2018; Miller et al.,  
136 2016), which will hopefully provide diagnostic utility for patients with psychiatric and  
137 neurological disorders (Drysdale et al., 2017; Elliott et al., 2018b; Koutsouleris et al., 2015;  
138 Nunes et al., 2018). However, the diagnostic value of brain MRI in psychiatric disorders has not  
139 yet been established, presumably because effect sizes tend to be small and overlap with  
140 variability in healthy individuals (Yamashita et al., 2019). Protocols of scanning and analysis  
141 have rarely been standardized across projects, though that has begun to change - especially for  
142 large projects such as the Human Connectome Project (HCP; (Van Essen et al., 2012)), UK  
143 Biobank (Miller et al., 2016), and the Adolescent Brain Cognitive Development (ABCD) project  
144 (Casey et al., 2018).

145

### 146 *1.1. Previous multi-site neuroimaging studies for neuropsychiatric disorders*

147 Several brain imaging projects have attempted to identify suitable biomarkers in  
148 neuropsychiatric diseases. Recent multi-site neuroimaging mega studies have revealed well-

149 replicated and clinically applicable findings from structural images; the Enhancing  
150 NeuroImaging Genetics through Meta-Analysis Consortium in the U.S. (n = 4,568) and the  
151 Cognitive Genetics Collaborative Research Organization in Japan (n = 2,564) replicated findings  
152 that patients with schizophrenia have volumetric alterations of subcortical structures when  
153 compared to healthy controls (Okada et al., 2016; van Erp et al., 2016). The findings were partly  
154 evident in other psychiatric disorders, such as bipolar disorder (BPD) and major depressive  
155 disorder (MDD) (Hibar et al., 2018; Schmaal et al., 2017; Schmaal et al., 2016; van Erp et al.,  
156 2016). Using resting-state functional MRI (rsfMRI), a multi-site study successfully developed  
157 generalized classifiers for psychiatric disorders. The Decoded Neurofeedback (DecNef) Project  
158 (<https://bicr.atr.jp/decnefpro/>), a multi-site neuroimaging study in Japan (12 sites, n = 2,409),  
159 developed a generalized classifier for autism spectrum disorder (ASD) with a high accuracy—  
160 not only for the data in three Japanese sites (85%) but also for the Autism Brain Imaging Data  
161 Exchange dataset (75%) (Yahata et al., 2016). The project also quantified the spectrum of  
162 psychiatric disorders by applying the ASD classifier to other multi-disorder datasets  
163 (schizophrenia, MDD, and attention-deficit/hyperactivity disorder). Therefore, the focus of  
164 mega-analyses is shifting from features found in case-control studies to cross-disease  
165 comparisons that can identify common and disease-specific features.

166 In the field of neurodegenerative disease, the Alzheimer's Disease Neuroimaging  
167 Initiative (ADNI) is one of many major multi-site neuroimaging and biomarker studies of  
168 Alzheimer's disease (AD) and mild cognitive impairment (MCI) that was started in 2005 in  
169 North America (Mueller et al., 2005; Weiner et al., 2015). It contributed to the development of  
170 blood and imaging biomarkers, the understanding of the biology and pathology of aging, and to  
171 date has resulted in over 1,800 publications. ADNI also impacted worldwide ADNI-like

172 programs in many countries including Japan, Australia, Argentina, Taiwan, China, Korea,  
173 Europe, and Italy. The Japanese ADNI (J-ADNI) conducted a multi-site neuroimaging study on  
174 cognitively normal elderly patients, MCI, and mild AD (n = 537), which emphasized the  
175 harmonization of the protocol and procedures with the ADNI (Iwatsubo et al., 2018). J-ADNI  
176 also developed machine learning techniques using feature-ranking, a genetic algorithm, and a  
177 structural MRI-based atrophy measure to predict the conversion from MCI to AD (Beheshti et  
178 al., 2017). Inspired by the Parkinson's Progression Markers Initiative (PPMI; (Parkinson  
179 Progression Marker Initiative, 2011), the Japanese (J-) PPMI team has also started a cohort in  
180 patients with rapid eye movement sleep behavioral disorder, which is regarded to be prodromal  
181 to Parkinson's disease (PD) (Mukai and Murata, 2017).

182         These previous mega-studies have contributed to the discovery of potential mechanisms  
183 and biomarkers of multiple brain disorders. However, most of these imaging biomarkers have a  
184 relatively small effect sizes and the study results were drawn from multi-site data which are often  
185 heterogenous and used now outdated traditional low-resolution data acquisition protocols. In  
186 addition, there have been no human brain MRI studies that explore multiple psychiatric and  
187 neurological disorders that occur through the lifespan within the same cohort of subjects.

188

### 189 *1.2. High-quality multi-modal MRI protocols and preprocessing pipelines*

190 The HCP developed a broad approach to improving brain imaging data acquisition,  
191 preprocessing, analysis, and sharing (Glasser et al., 2016b). It includes: 1) high-quality multi-  
192 modal data acquisition; 2) in a large number of subjects; and 3) high-quality data preprocessing  
193 and has proven usefulness of MRI techniques for understanding the detailed organization of a  
194 healthy human brain (Elliott et al., 2018a; Glasser et al., 2016a; Smith et al., 2015). The HCP

195 aimed to delineate the brain areas and characterize neural pathways that underlie brain function  
196 and behavior in 1,200 healthy young adults (Van Essen et al., 2012). HCP scans were performed  
197 by a single MR scanner (a customized 3T Skyra, Siemens Healthcare GmbH, Erlangen,  
198 Germany) in a total of 4-hour scan time for high-resolution multi-modal data, which included  
199 T1-weighted (T1w) images, T2-weighted (T2w) images, diffusion-weighted images (DWI),  
200 rsfMRI, and task fMRI (Glasser et al., 2016b; Glasser et al., 2013). The HCP also developed a  
201 set of preprocessing pipelines with improved cross-subject alignment that dramatically improves  
202 the spatial localization of brain imaging findings and also increasing statistical sensitivity  
203 (Coalson et al., 2018; Glasser et al., 2013; Robinson et al., 2018). For the Lifespan Developing  
204 and Aging HCP Projects (HCP-D and HCP-A) the original HCP protocol for healthy young  
205 adults was shortened, for children and the elderly (60 to 90 min scan time; (Bookheimer et al.,  
206 2019; Harms et al., 2018; Somerville et al., 2018), and for psychiatric and neurological disorders  
207 (the Connectomes Related to Human Disease [CRHD];  
208 <https://www.humanconnectome.org/disease-studies>), and adolescent development (the ABCD  
209 project; (Casey et al., 2018). The UK Biobank used an even more abbreviated scanning approach  
210 to collect a much larger number of cohort (n = 100,000) to predict health conditions (Miller et  
211 al., 2016).

212 Many of these high-quality multimodal projects have been based on a single or small  
213 number of the same model scanners at different sites and thus did not fully address  
214 standardization of the data acquisition across different scanner models or vendors. We aim to  
215 accelerate harmonization technologies to be used in at least five scanner platforms by combining  
216 approaches to high-quality imaging acquisition, preprocessing, study design, and statistical bias  
217 correction to potentially improve the sensitivity and validity of imaging biomarkers.



218

### 219 *1.3. Traveling subjects*

220 A harmonization approach is required for individual-based statistics using a multi-site dataset,  
221 even when the brain images are obtained using the same machine and protocol, because the data  
222 from each site has the bias from hardware and scanning protocol (measurement bias) and  
223 sampling variability (i.e. age, sex, handedness, and socioeconomic status). If measurement biases  
224 were correlated or anti-correlated with a specific disease state this would result in a positive or  
225 negative bias in a given measure, whereas uncorrelated biases would merely reduce sensitivity  
226 (i.e. SNR) of the measure. Sampling biases due to biological differences in the sampled  
227 populations should also be considered for both case and control groups. Data harmonization has  
228 been proposed to control for these biases, including a general linear model (GLM) with the site  
229 as the covariate, a Bayesian approach (Fortin et al., 2018; Fortin et al., 2017), and a meta-  
230 analytic approach (Okada et al., 2016; van Erp et al., 2016), but the methods used for controlling  
231 both biases are unable to distinguish between them (Yamashita et al., 2019). Inter-site cross-  
232 validation by machine learning and deep learning techniques is a method that aims to remove  
233 bias without any specific preparation if large-sample datasets are available (Nunes et al., 2018).  
234 However, this method extracts stable characteristics across the images and is limited to using  
235 only a part of the information for further analysis. In addition, it is unclear whether the classifiers  
236 obtained by such methods can be applied to an independent new site of the initial multi-site  
237 project.

238 The traveling subject (TS) approach is a powerful research design to control for site  
239 differences (Figure 1). This approach requires the images from the same participants at all the  
240 participating sites, but also requires significant effort from the sites and the participants when

241 compared to other harmonization methods listed above, and the TS scans must be completed  
242 before the analysis starts. However, the TS approach can differentiate most of the sample  
243 variability from measurement bias in functional MRI (Yamashita et al., 2019), structure and  
244 diffusion MRI (Tong et al., 2020). The DecNef Project explored rsfMRI functional connectivity  
245 for multiple psychiatric diseases and scanned nine TS participants who received repeated MRI  
246 measurements at all sites. Measurement and sampling biases for each group (schizophrenia,  
247 MDD, ASD, and healthy controls) were segregated from individual and disease-specific factors  
248 as the rest of sampling variability. The results showed that the effects of both bias types on  
249 functional connectivity were greater than or equal to those of disease-specific factors. With  
250 regard to measurement bias, differences in phase encoding direction had the biggest effect size  
251 when compared to those of vendor, coil, and scanner within the same vendor. The harmonization  
252 method was estimated to reduce measurement bias by 29% and improve the signal-to-noise ratio  
253 by 40% (Yamashita et al., 2019). Further investigations are needed to determine the best  
254 approach for reducing sampling bias arising from biological differences in the sampled  
255 population.  
256

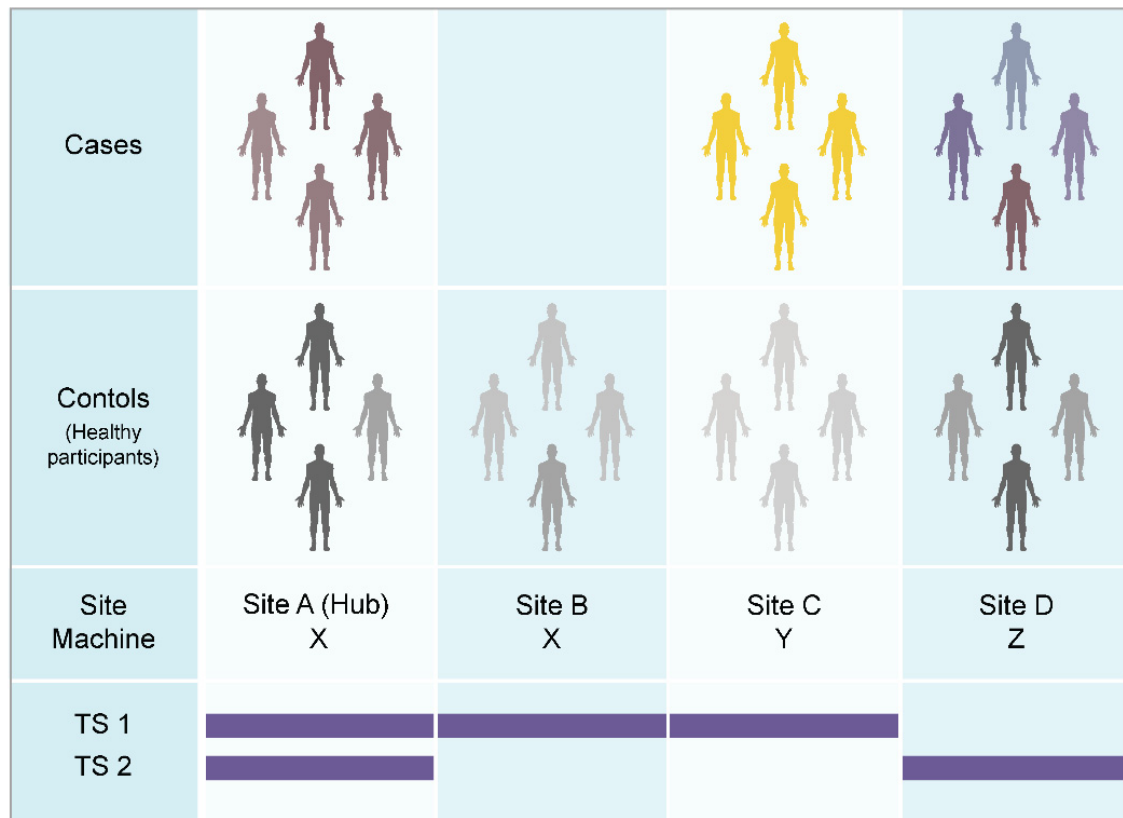

**Figure 1. Case-control studies and traveling subject approach.**

(Top) When we analyze multi-site data from a set of case-control MRI studies, we must consider machine and protocol-derived bias (measurement bias) as well as sampling bias (from biological differences in the sampled populations). Even if the machine and protocol are the same between sites (e.g. Sites A and B), measurement bias may still occur because of slight differences in the magnetic or radiofrequency fields, etc. Sampling bias should be considered for patient groups as well as control groups, given that the control participants were recruited according to the demographics in the patient group. (Bottom) The traveling subject (TS) harmonization approach enables us to combine with case-control datasets by differentiating between measurement and sampling biases (Yamashita et al., 2019). Based on the general linear model (GLM), TS participants need to receive measurements from all participating sites (e.g. only TS 1 dataset). To reduce the effort of TS participants and participating sites, this project applies a general linear mixed model (GLMM) approach and hub-and-spoke model to the TS project. With this approach, all participants receive scans at one or more hub sites (site A), and measurement bias is calculated using multiple TS datasets by means of a GLMM (TS 1 and 2).

257

258 *1.4. Brain/MINDS Beyond project*

259 The Strategic International Brain Science Research Promotion Program (Brain/MINDS Beyond;  
260 FY2018–FY2023; <https://brainminds-beyond.jp/>) was funded by the Japan Agency for Medical  
261 Research and Development (AMED) to support global brain research by enhancing collaboration  
262 with the domestic projects of other countries. Brain/MINDS Beyond consists of four research  
263 groups: G1-1, Identification of the pathogenic mechanism of psychiatric and neurological  
264 disorders through the acquisition and analysis of brain MRI-scan images and clinical data  
265 (Developmental [G1-1D], adult [G1-1A], and senescent [G1-1S] stages); G1-2, Brain MRI data  
266 acquisition, analysis, and informatics; G2, Research involving an inter-species comparison of  
267 human and nonhuman primate brains by structural and functional parcellation and homology  
268 analyses; and G3, Development and application of technologies, such as neuro-feedback through  
269 collaboration with artificial intelligence research projects as well as the Innovative Research  
270 Group. In human brain imaging, G1-1 intends to measure human participants, including patients  
271 with neuropsychiatric disorders, across the lifespan, and G1-2 intends to coordinate and support  
272 data acquisition, storage, preprocessing, analysis, and distribution (Figure 2 and Table 1). The  
273 Brain/MINDS Beyond MRI working group also set up a standardized procedure for MRI data  
274 acquisition (Harmonization protocol [HARP]) and clinical and neurocognitive data assessment  
275 (Tables 2 and 3). Following previous multi-site studies in Japan (Iwatsubo et al., 2018; Okada et  
276 al., 2016; Yahata et al., 2016; Yamashita et al., 2019), the overall goal of this project is expected  
277 to find altered brain imaging characteristics in psychiatric and neurological disorders that can be  
278 applied to future therapeutic investigations and clinical devices. To address limitations of  
279 previous findings in multi-site studies, we are using high performance research-based MRI  
280 scanners and we modeled our multi-modal protocol (T1w images, T2w images, diffusion-  
281 weighted imaging [DWI], rsfMRI, task fMRI, quantitative susceptibility mapping, and arterial

282 spin labeling) on that used by the HCP and ABCD study projects. We are also obtaining a TS  
283 dataset for the harmonization of the clinical MRI datasets and the development of technical tools  
284 to harmonize the multi-site data. Once the project period ends, the data will be openly distributed  
285 to researchers via a public database.

286 Here, we introduce the Brain/MINDS Beyond human brain MRI project and show  
287 preliminary results in high-quality neuroimaging using the TS data that is amenable to  
288 harmonization. We then discuss our plans for investigating the neural basis of psychiatric and  
289 neurological disorders in the hope of developing therapeutic targets and devices that are  
290 applicable to clinical settings.

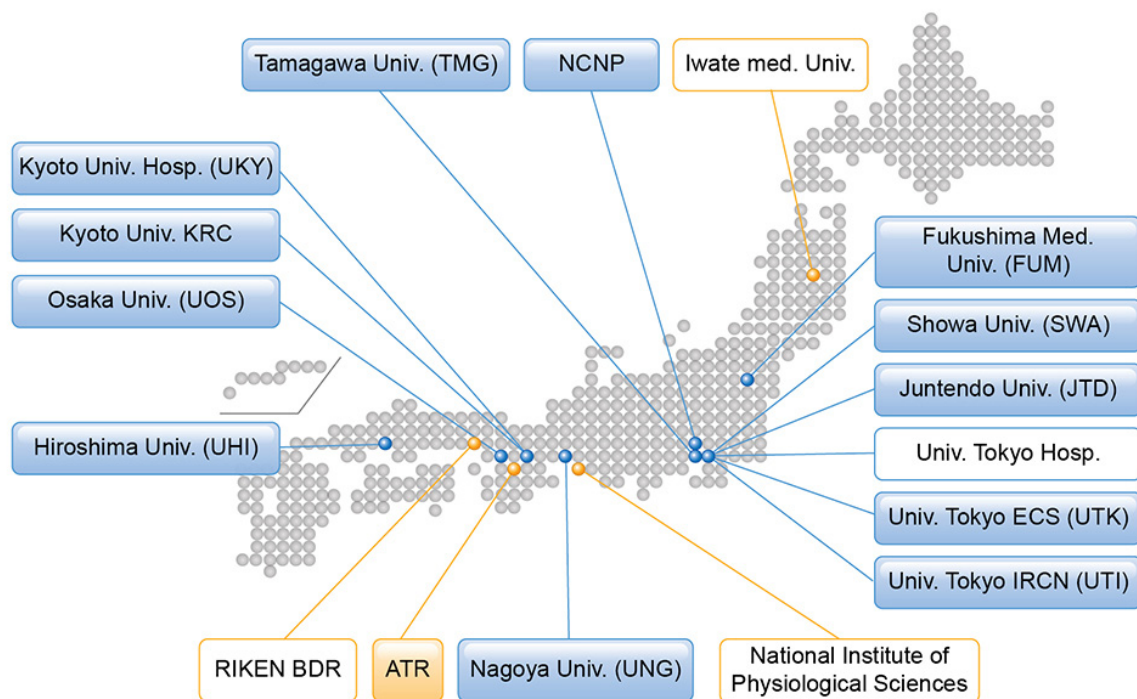

**Figure 2. Brain/MINDS Beyond human brain MRI project.**

Institutes in the blue boxes show measurement and analysis sites for neuropsychiatric disorders, and those in the orange boxes show analysis support sites. Institutes listed in boxes with a colored background represent participation in the traveling subject project.

291

## 292 **2. Brain/MINDS Beyond human brain MRI study**

### 293 *2.1. Participating sites and target population*

294 As of March 2020, 13 sites have approved this study project, received approval from their  
295 respective ethical review board(s), and obtained clinical and TS measurements using the  
296 appropriate MRI scanners (Table 1). Of these, 5 sites mainly explore psychiatric disorders  
297 (schizophrenia, ASD, MDD, and BPD), 4 sites neurological disorders (AD, PD, multiple system  
298 atrophy, progressive supranuclear palsy, chronic pain disorder, and epilepsy), and 2 sites both  
299 categories. Two sites measure the general adolescent population to investigate brain development  
300 and recruit through advertisement and cohort studies (Ando et al., 2019; Okada et al., 2019).  
301 Each site intends to obtain brain images and demographic (and clinical) characteristics for  
302 clinical cases and match controls for age, sex, premorbid IQ or educational attainment, socio-  
303 economic status, and handedness (See Cognitive and behavioral assessment section). The  
304 exclusion criteria were set by each study purpose (i.e. low premorbid IQ, history of loss of  
305 consciousness for more than 5 min, illegal drug use, and alcohol dependency). Illegal drug use  
306 can be a major concern for disease onset and poor prognosis, especially for psychiatric disorders.  
307 However, there is far less illegal drug use in Japan compared to Western European countries  
308 (Degenhardt et al., 2008; Lee and Kwon, 2016), and most of the participating sites excluded  
309 those with a current illegal drug use or previous history of regular use (Koike et al., 2013).

310 For the TS project, 75 healthy adults planned to undergo 6 to 8 scans at three or more  
311 sites within 6 months (See Traveling Subject Project section). Five or more participants per site  
312 were recruited. Each participant received test-retest scans at the recruitment site and underwent  
313 scans at different sites including a hub site. We set up three hub sites, according to a hub-and-

314 spoke model, in which all participants received scans using a MAGNETOM Prisma scanner  
 315 (Siemens Healthcare GmbH, Erlangen, Germany) and the CRHD and HARP protocols.

316 **Table 1. Participating sites of the Brain/MINDS Beyond MRI project.**

| Site | Research group | Role for the project                         | Role for TS | MRI scanner (System version) | Protocol | Main target population                         |
|------|----------------|----------------------------------------------|-------------|------------------------------|----------|------------------------------------------------|
| UTK  | G1-1D, G1-2    | Data acquisition/Analysis                    | Hub         | Prisma (VE11C)               | CRHD     | Adolescent cohort, HP, ASD, Sch, MDD, Epilepsy |
| UTI  | G1-1D, G1-2    | Data acquisition/Sharing                     | Hub         | Prisma (VE11C)               | CRHD     | HP, ASD, Sch, MDD, BPD                         |
| ATR  | G1-2, G3       | Data acquisition/Sharing/Analysis            | Hub         | Prisma (VE11C)               | CRHD     | HP                                             |
| FUM  | G1-1S          | Data acquisition                             | Spoke       | Skyra (VE11C)                | HARP     | HP, AD, PD                                     |
| TMG  | G1-1D          | HARP setup/Data acquisition                  | Spoke       | Trio (VB19A)                 | HARP     | Adolescent cohort                              |
| SWA  | G1-1D, G3, IR  | HARP setup/Data acquisition                  | Spoke       | Skyra (VE11E)                | HARP     | HP, ASD                                        |
| NCNP | G1-1S          | HARP setup/Data acquisition/Sharing/Analysis | Spoke       | Verio Tim+Dot (VD13A)        | HARP     | HP, Sch, MDD, AD, PD                           |
| JTD  | IR             | Data acquisition                             | Spoke       | Prisma (VE11C)               | HARP     | HP, PD, MSA, PSP                               |
| UOS  | G2             | Data acquisition                             | Spoke       | Prisma (VE11C)               | HARP     | HP, Chronic pain                               |
| UHI  | G1-1A, G3      | HARP setup/Data acquisition                  | Spoke       | Skyra (VE11C)                | HARP     | HP, MDD, BPD                                   |
| UNG  | BM             | Data acquisition                             | Spoke       | Verio (VB17A)                | HARP     | HP, Sch                                        |
| UKY  | G1-1S          | HARP setup/Data acquisition                  | Spoke       | Skyra (VE11C)                | HARP     | HP, AD, PD                                     |
| KRC  | G1-1A          | Data acquisition                             | Spoke       | Verio (VB17A)                | HARP     | HP, Sch, MDD, BPD                              |
| BDR  | G1-2           | HARP setup/Data Analysis                     | Spoke       | Prisma (VE11C)               | HARP     | NA                                             |

317 Abbreviations: UTK, The University of Tokyo ECS (Komaba Campus); UTI, The University of  
 318 Tokyo IRCN; FUM, Fukushima Medical University; TMG, Tamagawa Academy & University;  
 319 SWA, Showa University; NCNP, National Center of Neurology and Psychiatry; JTD, Juntendo  
 320 Hospital; ATR, Advanced Telecommunications Research Institute International; UOS, Osaka  
 321 University; UHI, Hiroshima University; UNG, Nagoya University; UKY, Kyoto University;  
 322 KRC, Kyoto University Kokoro Research Center; BDR, RIKEN Center for Biosystems  
 323 Dynamics Research; IR, Innovative Research Group in Brain/MINDS Beyond; BM,  
 324 Brain/MINDS project; CRHD, Human Connectome Studies Related To Human Disease protocol;  
 325 HARP, harmonization protocol; HP, healthy participants; ASD, autism spectrum disorders; Sch,  
 326 schizophrenia; MDD, major depressive disorder; BPD, bipolar disorder; AD, Alzheimer's  
 327 disease; PD, Parkinson disease; MSA, multiple system atrophy; PSP, progressive supranuclear  
 328 palsy.  
 329

330 *2.2. Harmonized brain MRI protocols*

331 We developed protocols that minimize potential differences related to measurement and increase  
332 the MR image sensitivity to brain organization in psychiatric and neurological disorders. From a  
333 neurobiological perspective, the cerebral cortex is organized by a 2D sheet-like structure with an  
334 average thickness of 2.6 mm embedded and folded in the ~1300 mL of brain volume (Glasser et  
335 al., 2016b). From a neuroimaging perspective, the spatial resolution and homogeneity of the  
336 images are important factors that may induce bias and error during the image analysis; these  
337 include partial voluming, image distortion, errors in brain segmentation, and registration. Of  
338 these, respecting spatial fidelity of neuroanatomical structures is the most important approach for  
339 achieving unbiased imaging (Glasser et al., 2016b). Therefore, the spatial resolution of the  
340 imaging was determined based on cortical thickness and was matched across all scanners. The  
341 phase encoding direction of EPI-based functional and diffusion MRI is an important factor that  
342 relates to spatial distortion (and signal loss in fMRI) in association with the polarity of the  
343 direction, echo spacing, and B0 magnetic field homogeneity; therefore, we acquire a spin-echo  
344 filed map with opposite phase encoding directions to enable distortion correction (Andersson et  
345 al., 2003). Based on these strategies, two MRI protocols were planned for use in the project: 1) a  
346 harmonized MRI protocol (HARP), which can be run on the multiple MRI scanners/sites within  
347 a period of 22 to 65 min; and 2) an ‘HCP style’ MRI protocol used by HCP CRHD for the high-  
348 performance 3T MRI scanner (e.g. MAGNETOM Prisma).

349 The HARP was created to be used at multiple MRI scanners/sites, and it was designed to  
350 obtain high-quality and standardized brain MRI data in a ‘clinically’ practical window of time  
351 (Table 2 and Supplementary Table S1). The parameters of the MRI scanners were as follows: 1)  
352 static magnetic field strength of 3T; 2) multi-array head coil with 32 or more channels; and 3)



353 ability to perform a multi-band EPI sequence provided from Center for Magnetic Resonance  
354 Research, University of Minnesota with an acceleration factor of 6 (Moeller et al., 2010;  
355 Setsompop et al., 2012; Xu et al., 2013). In 2019, the protocol was adapted for use with five MRI  
356 scanners/systems (MAGNETOM Prisma, Skyra, Trio A Tim, Verio, and Verio Dot; Siemens  
357 Healthcare GmbH, Erlangen, Germany), and we plan to expand it to different MRI  
358 scanners/vendors during the project period and in fact we are working on creating HARP  
359 protocol for GE scanners. The HARP was intended to perform the brain scan within a period of ~  
360 30 min using a high-resolution structural MRI scan (T1w and T2w, spatial resolution of 0.8 mm)  
361 and two high-sensitive rsfMRI scans with opposing phase directions, a spatial resolution of 2.4  
362 mm, and a temporal resolution of 0.8 s for a total of 10 minutes. The protocols also include  
363 optional sequences for four additional rsfMRI scans, task fMRI (Emotion and CARIT) (Winter  
364 and Sheridan, 2014), two DWI scans with opposing phase encoding directions, quantitative  
365 susceptibility mapping, and arterial spin labeling. The minimum and maximum scanning time of  
366 the HARP is 22 and 65 min, respectively (Table 2). The preliminary results across scanners and  
367 multi-array coils in the same subject (ID = 9503) revealed that the temporal signal-to-noise ratio  
368 (tSNR) was very high in all the scanners. The mean  $\pm$  standard deviation across 32k  
369 greyordinates was  $161 \pm 80$  in the Prisma at UTK,  $155 \pm 81$  in the Verio Dot at SWA,  $151 \pm 72$   
370 in the Skyra fit at SWA,  $151 \pm 80$  in the Verio at ATR, and  $150 \pm 74$  in the Prisma fit at ATR;  
371 the values and their distributions were similar across scanners/sites (Figure 3A).

372         The CRHD protocol was planned for collaboration with the HCP CRHD for the Early  
373 Psychosis Project. The HCP CRHD protocol also included high-resolution structural MRI  
374 (spatial resolution of 0.8 mm), high-resolution resting-state fMRI (spatial resolution of 2 mm)

375 with an opposing phase encoding direction and longer scan time, and high-resolution and high  
376 angular diffusion MRI.

377         The installation of the protocols in the MRI scanners was ensured by conducting  
378 hierarchical parameter checks and site visits at the beginning of the measurement period. After  
379 the protocol installation, each site sent XML files of the installed protocol from the MRI scanner  
380 to the protocol management site (UTK), and all the parameters were confirmed with a checksum  
381 algorithm using R (R Core Team, 2018). This process was useful for validating the protocols  
382 across sites/scanners because some of the MRI scanners actually underwent inappropriate  
383 installation and were set with different parameters. The results were then sent back to the  
384 collaborators, who edited the parameters. We also checked the DICOM files that are deposited in  
385 the ATR XNAT server. In this phase, we checked the parameters, slice numbers, and diffusion  
386 gradient information (bvec and bval).

387         The manuals were shared and used at the sites for protocol installation, demographic and  
388 clinical assessment before the scan (e.g. handedness), and the assessment of and instruction to  
389 participants during the scan (e.g. general instruction during the scan, fixation to the cross during  
390 rsfMRI scans, and the assessment of sleepiness during the rsfMRI).

391 **Table 2. CRHD and HARP protocols.**

| Subset               | Sequence                  | Prisma        |                   | Skyra, Trio,<br>Verio Dot, Verio | Participant<br>instruction |
|----------------------|---------------------------|---------------|-------------------|----------------------------------|----------------------------|
|                      |                           | CRHD          | HARP              | HARP                             |                            |
| rsfMRI 1             | SEF AP                    | 0:32          | 0:06              |                                  | Fixation                   |
|                      | BOLD AP                   | 5:46          | 5:08              |                                  | Fixation                   |
|                      | SEF PA                    | 0:32          | 0:06              |                                  | Fixation                   |
|                      | BOLD PA                   | 5:46          | 5:08              |                                  | Fixation                   |
| Structure            | T1 MPR                    | 6:38          | 5:22              |                                  | Rest                       |
|                      | T2 SPC                    | 5:57          | 5:31              | 5:22-6:26                        | Rest                       |
| <b>Subtotal</b>      |                           | <b>25 min</b> | <b>22 min</b>     | <b>22-23 min</b>                 |                            |
| ASL                  |                           | NA            | 2:45 <sup>b</sup> |                                  | Rest                       |
| QSM                  |                           | NA            | 5:03 <sup>c</sup> |                                  | Rest                       |
| DWI                  | AP                        | 6:07          | 3:29              | 4:50                             | Rest                       |
|                      | PA                        | 6:05          | 3:32              | 4:54                             | Rest                       |
|                      | AP                        | 5:39          | NA                | NA                               | Rest                       |
|                      | PA                        | 5:39          | NA                | NA                               | Rest                       |
| rsfMRI 2             | See rsfMRI 1 <sup>a</sup> | 13 min        | 11 min            |                                  | Fixation                   |
| rsfMRI 3             | See rsfMRI 1 <sup>a</sup> | NA            | 11 min            |                                  | Fixation                   |
| Task fMRI<br>EMOTION | SEF AP                    | NA            | 0.06              |                                  | Task                       |
|                      | SEF PA                    | NA            | 0.06              |                                  | Task                       |
|                      | BOLD PA                   | NA            | 4.08              |                                  | Task                       |
| Task fMRI<br>CARIT   | SEF AP                    | NA            | 0.06              |                                  | Task                       |
|                      | SEF PA                    | NA            | 0.06              |                                  | Task                       |
|                      | BOLD PA                   | NA            | 4.08              |                                  | Task                       |
| <b>Total</b>         |                           | <b>61 min</b> | <b>68 min</b>     | <b>59-68 min</b>                 |                            |

392 Abbreviations: rsfMRI, resting-state functional MRI; ASL, arterial spin labeling; QSM,  
 393 quantitative susceptibility mapping; DWI, diffusion weighted imaging; SEF, spin echo field  
 394 mapping; BOLD, blood oxygenation level dependent; T1 MPR, T1-weighted magnetization  
 395 prepared rapid acquisition with gradient echo; T2 SPC, T2-weighted sampling perfection with  
 396 application optimized contrasts using different flip angle evolutions.

397 a set of SEF AP, BOLD AP, SEF PA, and BOLD PA.

398 b Only for Prisma and Skyra.

399 c Only for Prisma, Skyra, and Verio Dot.

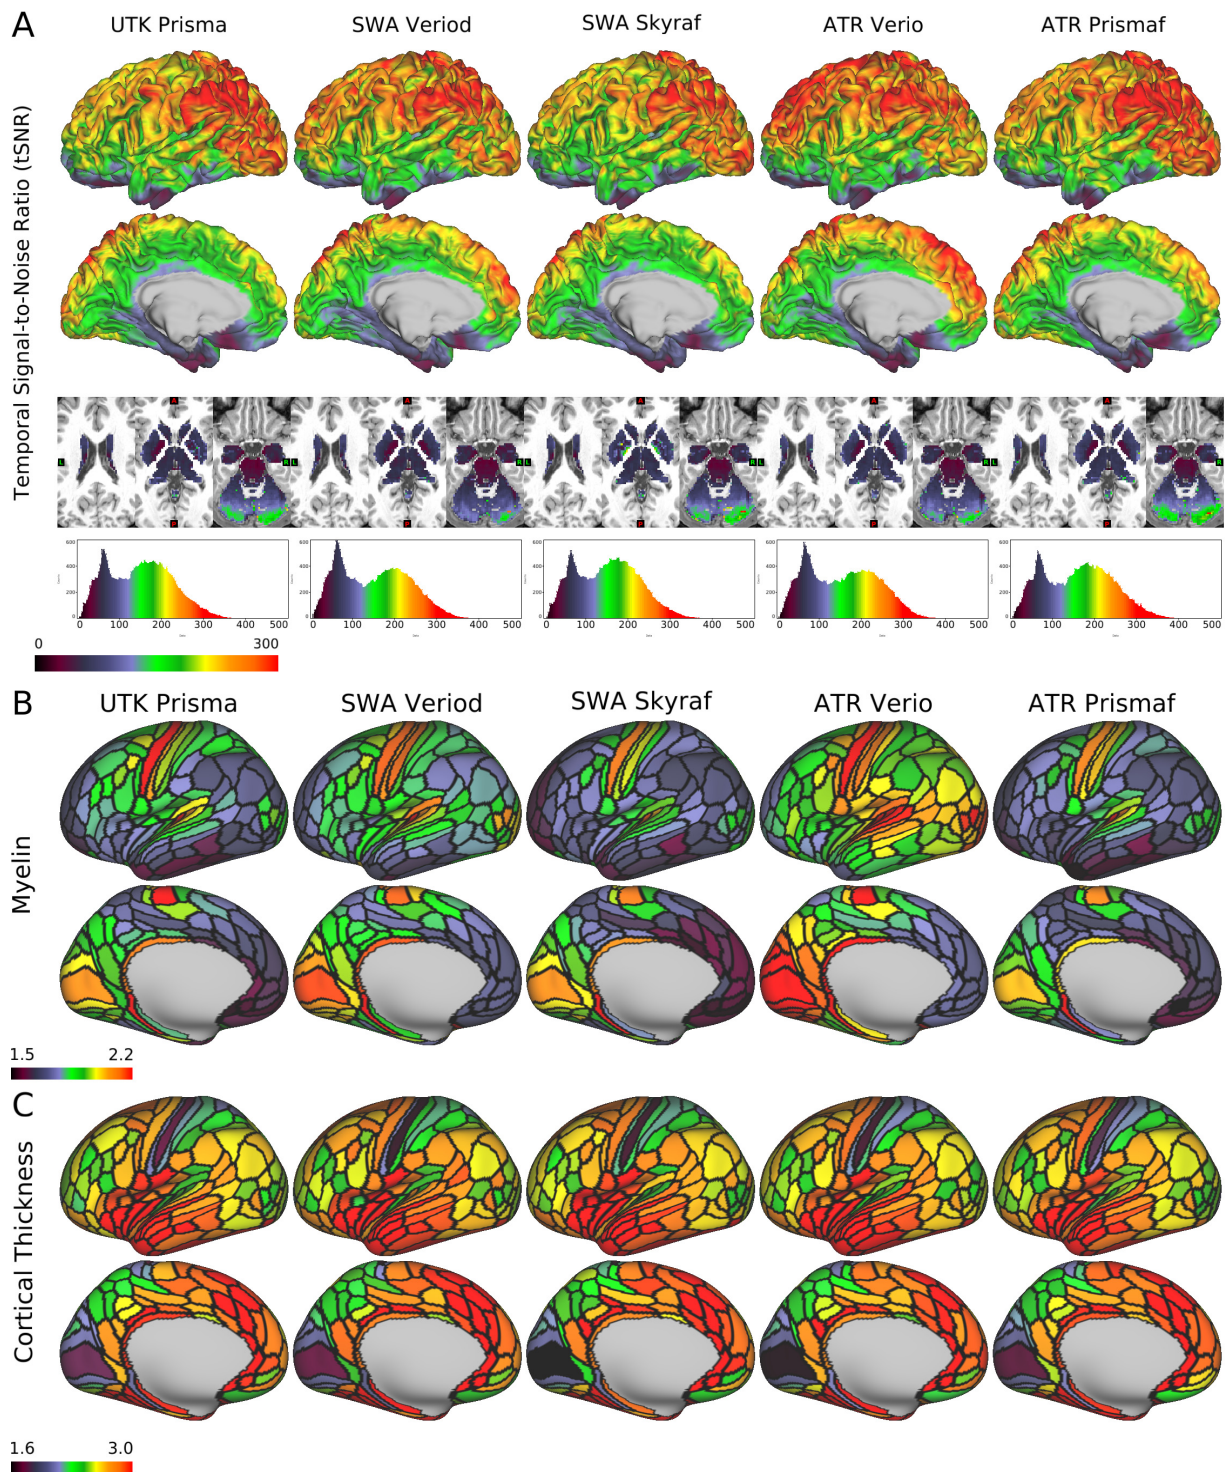

**Figure 3. Quality of MRI and preliminary cortical structures obtained by HARP in a single traveling subject across scanners/sites.**

A) Temporal signal-to-noise ratio (tSNR) obtained in a single subject (ID = 9503) across different scanners/sites by a harmonized MRI protocol (a sequence of functional MRI in HARP using a multi-band echo planar imaging with TR/TE = 800/34.4 ms; see Supplementary Table S1 for other details). The images from top to bottom show color-coded tSNR maps in 32k greyordinates (see main text) overlaid on the lateral and medial surface of the mid-thickness surface of the left hemisphere, the subcortical sections of the T1w image, and the histogram of the tSNR values. B) Cortical myelin contrast (T1w/T2w ratio) across different scanners. The myelin contrast is not corrected for the biasfield and parcellated by the HCP MMP v1.0 (Glasser et al., 2016a). C) The map shows cortical thickness across different scanners. Cortical thickness is corrected by curvature and parcellated by the HCP MMP v1.0. The tSNR, myelin map and cortical thickness are comparable across scanners. Data at <https://balsa.wustl.edu/7q4P9> and <https://balsa.wustl.edu/6Vvqv>

400

### 401 *2.3. Cognitive and behavioral assessment*

402 Each participating site assesses demographic characteristics (i.e. age, sex, and socioeconomic  
403 status), clinical characteristics (i.e. diagnosis, symptom severity, cognitive function, and general  
404 functioning), and subjective social evaluations (i.e. quality of life and well-being) (Table 3).

405 Each subgroup (G1-1D, G1-1A, G1-1S, and G1-2 TS) indicates standard scales, some of which  
406 are uniform across subgroups and easier to share and use when analyzing brain images.

407 **Table 3. Clinical and neuropsychological assessment.**

|                                 | G1-1D                                                                                                 | G1-1A                    | G1-1S                                                                      |
|---------------------------------|-------------------------------------------------------------------------------------------------------|--------------------------|----------------------------------------------------------------------------|
| Depression                      | K6 or BDI-II                                                                                          | BDI-II and PHQ-9         | PHQ-9 and BDI-II/GDS-15                                                    |
| Anxiety                         | —                                                                                                     | GAD-7                    | STAI                                                                       |
| Autism                          | AQ-10, AQ-50 or SRS-2 (for developmental disorders)                                                   | AQ-10 or AQ-50           | —                                                                          |
| Psychosis                       | APSS                                                                                                  | —                        | NPI-Q                                                                      |
| Intellectual ability            | JART-25 or WAIS-III (WISC at the age of 15 years or less) Information and Picture completion subtests | JART-25                  | JART-25                                                                    |
| Cognitive function              | CANTAB or BACS-J                                                                                      | CANTAB or BACS-J         | ADAS-Cog11, CDT, CDR, FAB, HVLT-R, JLO, MMSE, MoCA-J, SDMT, TMT-A/B, WMS-R |
| General function and disability | GAF, mGAF or WHO-DAS 2.0                                                                              | GAF, mGAF or WHO-DAS 2.0 | Schwab & England ADL                                                       |
| Quality of life                 | EQ-5D                                                                                                 | EQ-5D                    | PASE                                                                       |
| Well-being                      | WHO-5                                                                                                 | WHO-5                    | SHAPS                                                                      |
| Handedness                      | EHRs or UTokyo                                                                                        | EHRs or UTokyo           | UTokyo                                                                     |

408 Abbreviations: K6, 6-item Kessler Screening Scale for Psychological Distress; BDI-II, Beck  
409 Depression Inventory — Second Edition; PHQ-9, Patient Health Questionnaire-9; GDS-15,  
410 Geriatric Depression Scale 15; GAD-7, General Anxiety Disorder-7; STAI, State-Trait Anxiety  
411 Inventory; AQ-10, 10-item short version of the Autism Spectrum Quotient; AQ-50, Autism  
412 Spectrum Quotient (original version); APSS, Adolescent Psychotic-like Symptom Screener;  
413 NPI-Q, Neuro Psychiatric Inventory-Brief Questionnaire Form; JART-25, 25-item short version  
414 of the Japanese Adult Reading Test; WAIS-III, Wechsler Adult Intelligence Scale — Third  
415 Edition; GAF, Global Assessment of Functioning; mGAF, modified GAF; WHO-DAS 2.0, the  
416 World Health Organization Disability Assessment Schedule II; Schwab & England ADL,  
417 Modified Schwab and England ADL (Activities of Daily Living) scale; CANTAB, Cambridge  
418 Neuropsychological Test Automated Battery; BACS-J, the Brief Assessment of Cognition in  
419 Schizophrenia Japanese version; ADAS-Cog, Alzheimer’s Disease Assessment Scale-cognitive  
420 component; CDT, Clock Drawing Test; CDR, Clinical Dementia Rating; FAB, Frontal  
421 Assessment Battery; HVLT-R, Hopkins Verbal Learning Test-Revised; JLO, Judgment of Line  
422 Orientation; MMSE, Mini-Mental State Examination; MoCA-J, Japanese version of Montreal  
423 Cognitive Assessment; SDMT, Symbol Digit Modality Test; TMT-A/B, Trail Making Test Parts  
424 A and B; WMS-R, Wechsler Memory Scale-Revised; EQ-5D, EuroQol 5 Dimension  
425 questionnaire; WHO-5, World Health Organization-Five Well-Being Index; PACE, Physical  
426 Activity Scale for Elderly; SHAPS, Snaith-Hamilton Pleasure Scale; EHI, Edinburgh  
427 Handedness Inventory; UTokyo, 14-item Rating Scale of Handedness for Biological Psychiatry  
428 Research among Japanese People.

429 *2.4. Travelling subject project*

430 Based on the previous study (Yamashita et al., 2019), we conduct a TS project for the CRHD and  
431 HARP protocols. At some sites, we also scan TS with the previous protocol (named as SRPB  
432 [Strategic Research Program for Brain science]), which was used in the multi-site studies to  
433 achieve retrospective harmonization (Iwatsubo et al., 2018; Okada et al., 2016; Yahata et al.,  
434 2016; Yamashita et al., 2019). Because we limit the scanners, head coils, and protocols in this  
435 project, we expect to see reduced measurement biases, which may enhance the disease-related  
436 effect size in clinical studies and provide better ways to diminish bias in future studies.

437         The previous data harmonization using the TS dataset was based on a GLM (Yamashita  
438 et al., 2019), in which participants needed to travel to all the sites/scanners. In contrast, the  
439 present TS project was designed so that the participants travel only some of the test  
440 sites/scanners, and statistical harmonization flexibly adapt the incompleteness by using a general  
441 linear mixed model (GLMM; Figure 1). This design may also adapt the incompleteness of the  
442 scanning for each participant, since the current protocols require a longer scan time compared to  
443 previous ones, and thus result in potential cancellation or data completeness. To ensure  
444 harmonization across all the sites/scanners, we applied a hub-and-spoke model to arrange  
445 traveling scans at each recruitment site (Supplementary Table S2). Each participant undergoes  
446 CRHD and HARP scans using the Prisma (~2 hours) at one or more hub sites (UTK, UTI, and  
447 ATR) to harmonize the data within the Brain/MINDS Beyond project and other projects (e.g.  
448 Brain/MINDS, HCP, and ABCD) and test the difference in quality between the protocols. The  
449 other visiting sites were determined in consideration of the site locations, machine differences,  
450 and project similarities between the sites. Each participant receives multiple scans at the  
451 recruitment site to assess the test-retest reliability (1-hour x 2 sessions).

452 For the TS project, 75 healthy adults—five or more participants per site—are scheduled  
453 to undergo 6 to 8 scans at three or more sites within 6 months (Supplementary Table S2). The  
454 total number of scans and spokes between the sites are expected to be 455 and 465, respectively  
455 (Figure 4A). As of March 2020, 74 participants were registered and 405 scans (89.0 %) were  
456 completed and uploaded to the ATR XNAT server. The data provided 368 spokes (76.1 %,  
457 Figure 4B). The TS project will end in August 2020.  
458

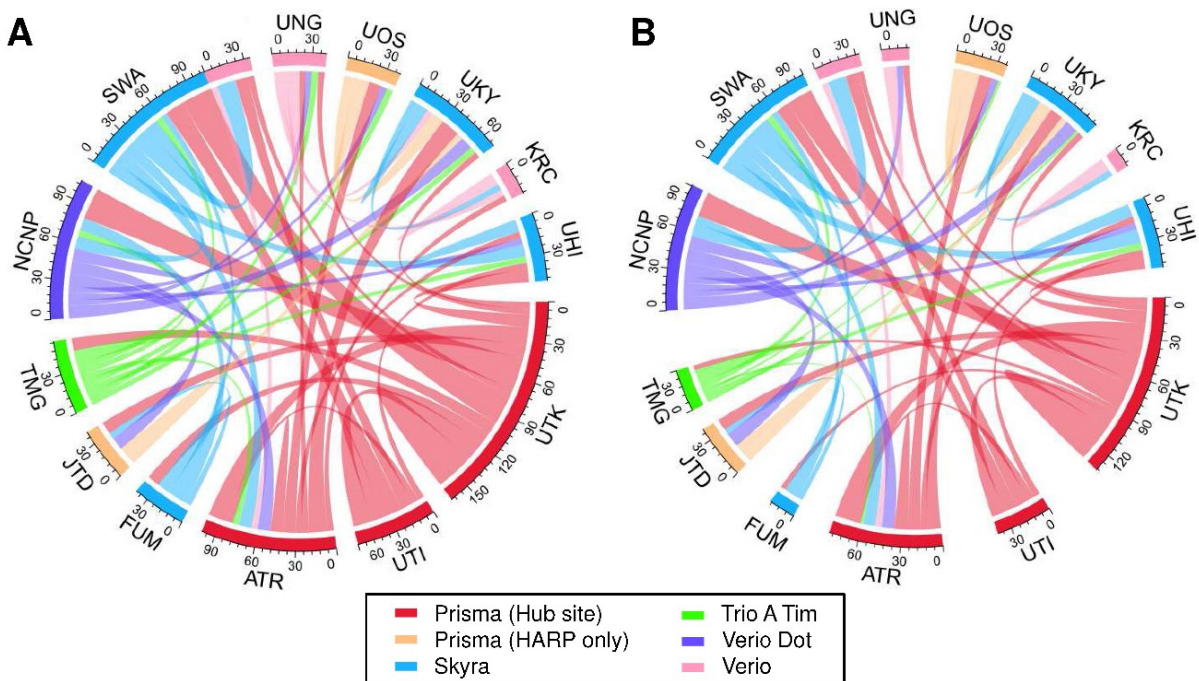

**Figure 4. Expected and current data connection of the traveling subjects.**

Data connections in the traveling subject project that were (A) initially planned and (B) the actual connections as of March 2020. Hub sites using Prisma and other sites using Prisma, Skyra, Trio A Tim, Verio Dot, and Verio are illustrated in red, orange, blue, green, purple, and pink, respectively.

459

460 *2.5. Data storage, preprocessing, and quality control*

461 *2.5.1. Data logistics*



462 Brain MR images obtained using the CRHD and HARP protocols in this study project and  
463 related studies are stored, preprocessed, and distributed using the XNAT server system  
464 (<https://www.xnat.org/>) (Figure 5). Due to the legacy of previous multi-site studies (Iwatsubo et  
465 al., 2018; Yahata et al., 2016; Yamashita et al., 2019), several data centers were already available  
466 for this project. The images obtained from the development and adult projects (G1-1D and G1-  
467 1A) will be sent to an XNAT server at ATR and the clinical data will be sent to UTI. For the  
468 senescent project (G1-1S), all the data will be sent to the NCNP (Iwatsubo et al., 2018). The TS  
469 data will also be sent to the ATR server shown in dashed lines. When uploading to the XNAT  
470 server, personal information (i.e. name and date of birth) contained in DICOM is automatically  
471 removed using an anonymization script of XNAT. A defacing procedure is performed for T1w  
472 and T2w images. These processes de-identify the MRI data. After manually checking whether  
473 the face images are completely obscured, all the anonymized MRI data are shared using Amazon  
474 AWS with RIKEN BDR, in which all image preprocessing is performed (See Preprocessing  
475 pipelines section). Preprocessed data are sent back to the servers and can be seen with limited  
476 access (i.e. participating sites). After a quality control (QC), cleaned imaging data with a  
477 demographic and clinical datasheet will be stored in the distribution server(s). All data will be  
478 also sent to backup server(s).

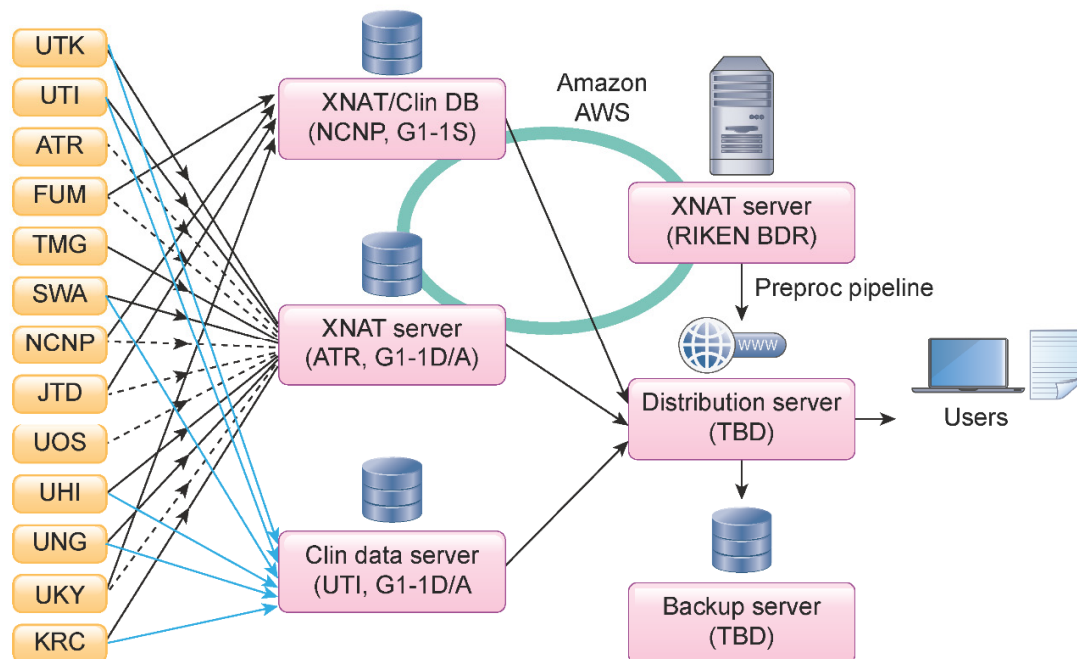

**Figure 5. Data storage, preprocessing, quality check, and data sharing.**

MRI (black line) and clinical (blue line) data from G1-1D and G1-1A sites are sent to the XNAT server and a data server at ATR and UTI, respectively. All data from G1-1S sites are sent to an XNAT server and a data server managed by NCNP, as this group applied a standard clinical assessment protocol to the project following a previous multi-site study. Traveling subject data from G1-1S sites are also sent to the XNAT server in ATR (dot line). XNAT servers at NCNP, ATR, and RIKEN BDR are linked by Amazon AWS to share the imaging data. NCNP manages a separate server for storing clinical data (Clin DB) being collected from the participants in this project. All MR images are preprocessed at RIKEN BDR. All MR images are preprocessed at RIKEN BDR. All the raw and preprocessed data will be stored and provided to the users in a distribution server. A backup server will be placed at a different site.

479

#### 480 2.5.2. Preprocessing pipelines

481 All neuroimaging data are preprocessed at RIKEN BDR for this project. The MR images are sent  
482 via Amazon S3 to a high-throughput parallel computing system at RIKEN BDR for  
483 preprocessing. The raw MRI data in DICOM format are converted to those in NIFTI using a  
484 conversion program, BCILDCMCONVERT ([https://github.com/RIKEN-](https://github.com/RIKEN-BCIL/BCILDCMCONVERT)  
485 [BCIL/BCILDCMCONVERT](https://github.com/RIKEN-BCIL/BCILDCMCONVERT)), by which folder structures are created and all the imaging  
486 parameters are read and stored including the type of gradient, k-space read out time in phase and

487 read directions, phase encoding directions, to be used for preprocessing. The preprocessing is  
488 performed using the HCP pipeline 4.2.0 (Glasser et al., 2013) with modifications for adapting  
489 and harmonizing multiple scanners. In brief, the structural MRI (T1w and T2w) is first corrected  
490 for image distortions related to the gradient nonlinearity in each scanner type and the  
491 inhomogeneity of the B0 static magnetic field in each scan. The signal homogeneity is dealt with  
492 by prescan normalization and is also improved by a biasfield correction using T1w and T2w  
493 images (Glasser and Van Essen, 2011). The T1w and T2w images are fed into non-linear  
494 registration to the Montreal Neurological Institute (MNI) space and used for cortical surface  
495 reconstruction using FreeSurfer (Fischl, 2012), surface registration using multi-modal surface  
496 matching (MSM) (Robinson et al., 2018) and folding pattern (MSMsulc); this is followed by the  
497 creation of a myelin map using T1w divided by T2w and surface mapping (Glasser and Van  
498 Essen, 2011). An example of a cortical myelin map (not biasfield corrected [non BC]) in a single  
499 subject (ID = 9503) across scanners/sites is parcellated by HCP MMP v1.0 (Glasser et al., 2016a)  
500 and presented in Figure 3B, revealing the typical cortical distribution of the high myelin contrast  
501 in the primary sensorimotor (areas 1, 3a, 3b, 4), auditory (A1), visual (V1), middle temporal, and  
502 ventral prefrontal (47m) areas—as demonstrated previously (Glasser and Van Essen, 2011). The  
503 distributions over the cortex were comparable between scanners, although absolute values were  
504 slightly different suggesting the residual bias from transmit field across scans/scanners (see also  
505 2.5.3).

506 The functional MRI data is corrected for distortion (gradient nonlinearity and B0-  
507 inhomogeneity) and motion. The distortion from B0 static field inhomogeneity is corrected by  
508 means of opposite phase encoding spin echo fieldmap data using TOPUP (Andersson et al.,  
509 2003); it is then warped and resampled to MNI space at a 2 mm resolution and saved as a volume

510 in the Neuroimaging Informatics Technology Initiative (NIFTI) format. The region of the  
511 cortical ribbon in the fMRI volume is further mapped onto the cortical surface and combined  
512 with voxels in the subcortical gray region to create 32k greyordinates in the Connectivity  
513 Informatics Technology Initiative (CIFTI) format. Multiple runs of the fMRI data are merged  
514 and fed into independent component analyses (ICA) followed by an automated classification of  
515 noise components and the removal of noise components using FIX (Salimi-Khorshidi et al.,  
516 2014) (Glasser et al., 2018). The automated classifier is trained using the data in this project and  
517 its accuracy is maximized. The denoised fMRI data, in combination with other cortical metrics  
518 (myelin, thickness; Figure 3B and 3C, respectively), is further used for multi-modal registrations  
519 (MSMAll) over the cortical surface, followed by ‘de-drifting’ (removing registration bias after  
520 multimodal registration) based on the group sampled in this study (Glasser et al., 2016a). The  
521 resting-state seed-based functional connectivity in an example of a single subject (ID = 9503)  
522 revealed a typical pattern over the cerebral cortex across scanners/sites; the left frontal eye field  
523 (FEF)-seed functional connectivity showed symmetric coactivation in the bilateral premotor eye  
524 field (PEF) (Figure 6A), whereas the left area 55b-seed FC showed an asymmetric language  
525 network distributed in the peri-sylvian language (PSL) area, superior temporal sulcus (STS), and  
526 areas 44/45 predominantly in the left hemisphere (Figure 6B).

527         The diffusion MRI is corrected for distortion and motion due to gradient nonlinearity,  
528 eddy current, motion, and B0 static field inhomogeneity using EDDY (Andersson and  
529 Sotiropoulos, 2016). The signal dropouts, susceptibility artefact, and their interaction with  
530 motion were also corrected (Andersson et al., 2018; Andersson et al., 2017). The resulting  
531 diffusion volumes are merged into a single volume and resampled in the subject’s real physical  
532 space aligned according to the ACPC convention. Diffusion modeling is performed using nerite

533 orientation density imaging (NODDI) (Fukutomi et al., 2018; Zhang et al., 2012), and a Bayesian  
534 estimation of crossing fibers (Behrens et al., 2003; Sotiropoulos et al., 2016). Diffusion  
535 probabilistic tractography (Behrens et al., 2003) is also performed in a surface-based analysis  
536 (Donahue et al., 2016).

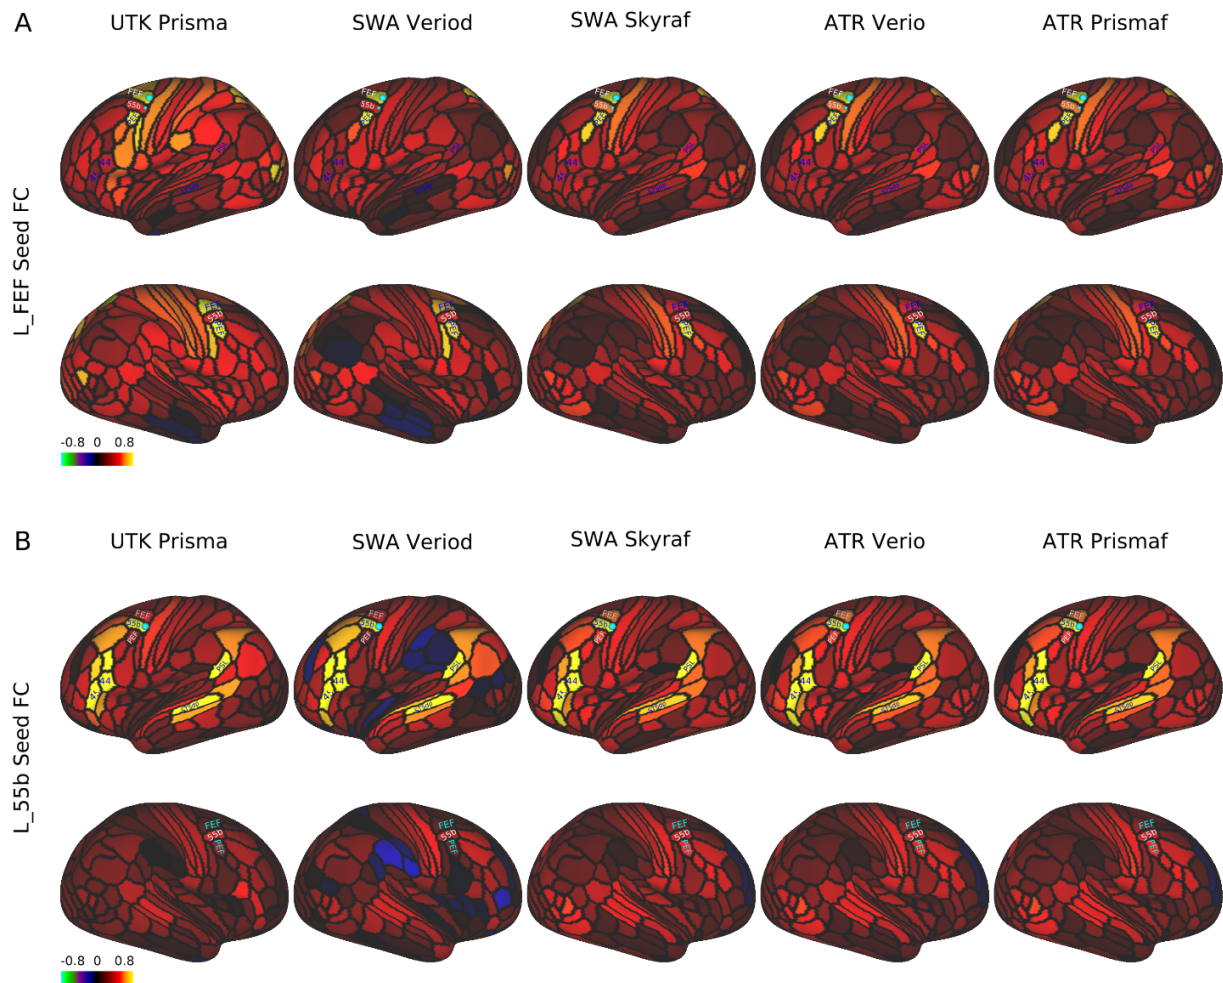

**Figure 6. Seed-based resting-state functional connectivity in a single traveling subject across scanners/sites**

In a single subject (ID = 9503), the resting-state fMRI scans (5 min x 4) were collected using a scanning protocol of HARP across different scanners/sites (see Supplementary Table S1), preprocessed, and denoised by a surface-based analysis to generate parcellated functional connectivity (FC) using the HCP MMP v1.0 (Glasser et al., 2016a). A) FC seeded from the left frontal eye field (FEF), which was distributed symmetrically in the bilateral premotor eye field (PEF) and comparable across scanners/sites. B) FC seeded from the left area 55b, which showed an asymmetric language network predominant in the left hemisphere that was comparable across

scanners/sites. The language network is distributed in the areas of 44/45, superior temporal sulcus, dorsal posterior part (STSdp), and peri-sylvian language (PSL). Data at <https://balsa.wustl.edu/1B9VG> and <https://balsa.wustl.edu/5Xr71>

537

### 538 *2.5.3 Preliminary travelling subject data*

539 Here, we show the preliminary results obtained from the initial TS data (as detailed in section  
540 2.4). In the initial TS study (N=30), four healthy subjects participated and travelled across five  
541 sites and received MRI scanning with HARP in different scanners (4TS×5S), and twenty six  
542 subjects completed test-retest scans in any of 5 scanners (26TS×2/5S). Datasets were analyzed  
543 with the current version of preprocessing (see section 2.5.2) and each of the cortical thickness,  
544 myelin (non BC), and functional connectivity was parcellated using HCP MMP v1.0 (Glasser et  
545 al., 2016a) as described above (a part of the parcellated data in an exemplar subject [ID = 9503]  
546 was already shown in Figure 3 and 6). To investigate similarity of the data, each of the  
547 parcellated metrics was fed into an analysis of Spearman's rank correlation across subjects and  
548 sites/scanners. Figure 7 shows the resultant similarity matrices which demonstrate higher  
549 correlation coefficients of within-subjects & between scanners than those of cross-subjects &  
550 between scanners in all the metrics of cortical thickness, myelin, and functional connectivity.

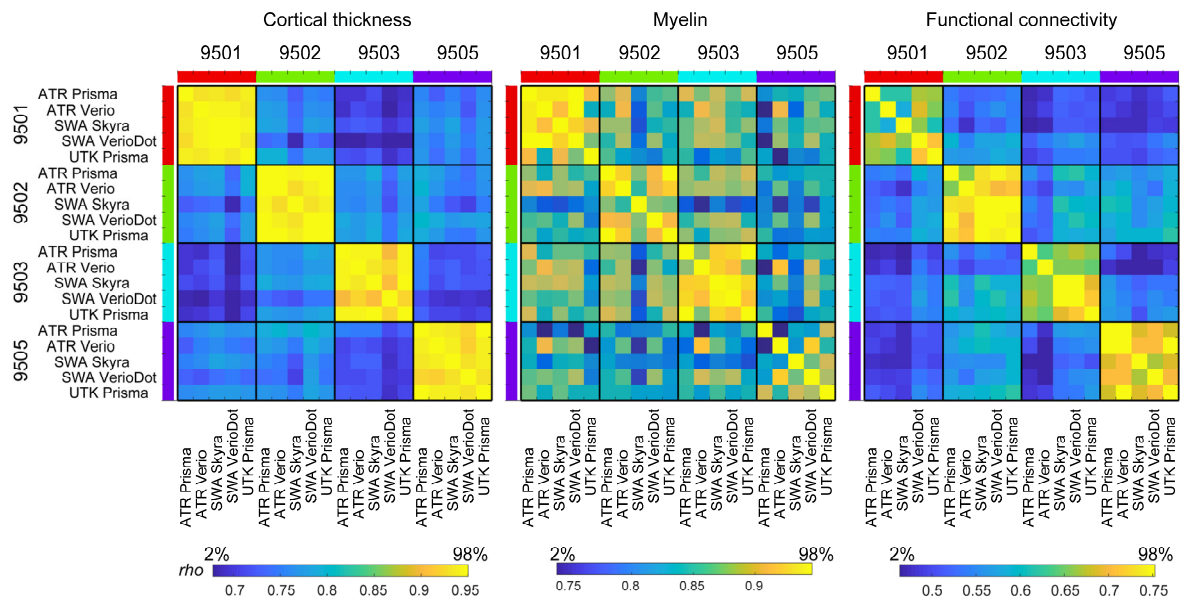

**Figure 7. Similarity of the cortical metrics across subjects and sites/scanners in preliminary travelling subject study**

From left to right show the correlation matrices of the parcellated cortical thickness, myelin (non BC) and functional connectivity in four travelling subjects (TS). Number of parcellated metrics used for analysis were 360 for thickness and myelin and 129,240 for functional connectivity, which cover all the cerebral cortex in both hemispheres. The correlation coefficient of Spearman's rho is presented by a color bar placed at the bottom.

551 We also analyzed a different set of TS (N=26), who received test-retest scanning with the HARP  
 552 protocol in the same MRI sites/scanners. The results (Fig. 8) showed greater similarity of cortical  
 553 thickness, myelin map, and functional connectivity between test-retest data within subjects as  
 554 compared with those with different subjects and/or scanners. The correlation coefficients of  
 555 within-subject & within-scanner were again moderately high and comparable with those of  
 556 within-subject & between-scanners in Fig 7.

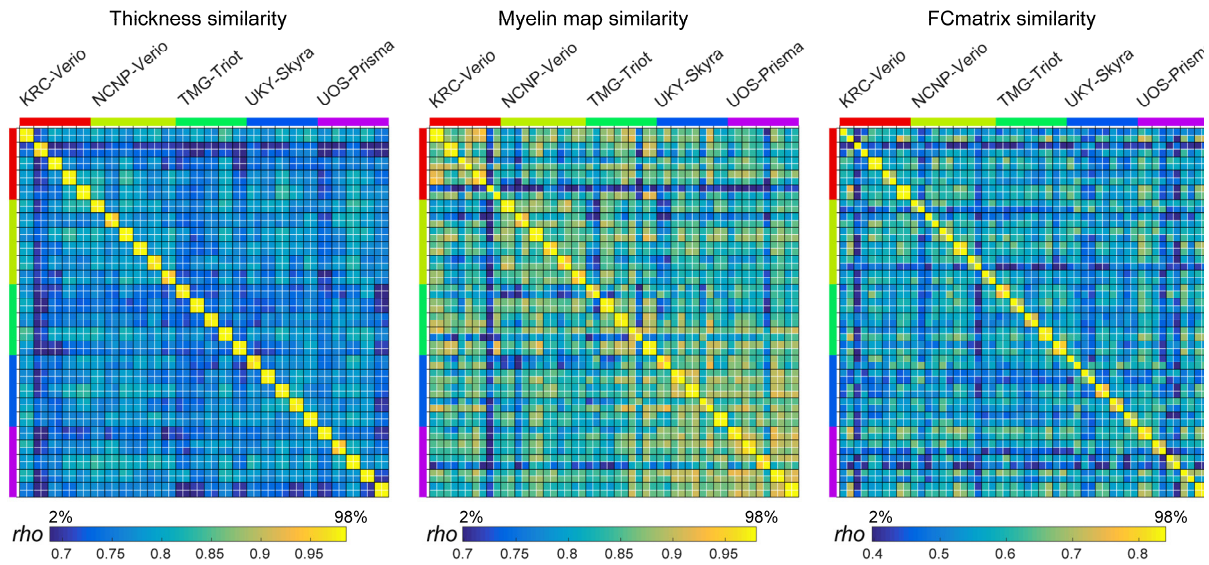

**Figure 8.** Test-retest results of cortical thickness, myelin (non BC) and resting-state functional connectivity (FC). Note that correlation adjacent to the diagonal and within each black box indicates a single subject's test-retest correlation and is excellent in structure (thickness and myelin) and fairly good in FC. The different sites are colored along the left and top edges.

557

558 Table 4 summarizes the similarity values of all the TS30 data in Fig 7 and 8, classified into four

559 types: within-subject & within-scanner, within-subject & between-scanner, between-subject &

560 within-scanner, and between-subject & between-scanner. It is notable that the within-subject

561 similarities are apparently higher than those of between-subject, indicating high sensitivity and

562 reproducibility of subject-wise connectome. The between-subject similarities are smaller than

563 within-subject and almost same across scanners, suggesting minimal bias between scanners and

564 protocols. The within-subject & between-scanner similarity of the myelin map ( $0.89 \pm 0.05$ ) was

565 slightly degraded as compared with within-subject & within-scanner ( $0.95 \pm 0.03$ ), suggesting the

566 residual bias from transmit field across scans, for which we need to develop the correction

567 method in future. That said, these preliminary datasets indicate that the HARP protocols and

568 cortical parcellated analysis provide highly reproducible and specific pattern of subject-wise



569 connectome, which may effectively enhance statistical harmonization (see Section 2.4) once the  
570 data was fully collected in this project.

571

572 **Table 4. Summary of similarity of cortical measures in TS30**

| Type of correlation                                                                           | Thickness   | Myelin Map<br>(non BC) | FC matrix   |
|-----------------------------------------------------------------------------------------------|-------------|------------------------|-------------|
| <b>Within-subject &amp; within-scanner correlation (Subject N=26, combination N=26)</b>       | 0.97 (0.01) | 0.95 (0.03)            | 0.72 (0.08) |
| <b>Within-subject &amp; between-scanner correlation (Subject N=4, combination N=40)</b>       | 0.94 (0.01) | 0.89 (0.05)            | 0.69 (0.04) |
| <b>Between-subject &amp; within-scanner correlation (Subject N=30, combination N=250)</b>     | 0.76 (0.03) | 0.85 (0.05)            | 0.55 (0.07) |
| <b>Between-subject &amp; between-scanner correlation (Subject N = 30, combination N=1200)</b> | 0.76 (0.03) | 0.83 (0.05)            | 0.55 (0.07) |

573 The values are shown in mean (s.d.). The combination N: a total number of similarity values used for statistics  
574 in the matrices in Fig 7 and 8. No BC: non biasfield corrected.

575

#### 576 *2.5.4. Quality control*

577 QC is implemented in several stages: 1) a brief image check during each scan; 2) an anomaly and  
578 abnormality inspection by the radiologists; 3) an assessment of raw data image quality when  
579 uploading data to the XNAT server; and 4) preprocessed image quality checks. QC 1 is  
580 conducted by site personnel and the participants are rescanned within the same session if scan  
581 time remains, if the images have major artifacts, such as those due to head movement. QC 2 is  
582 conducted by radiologists at the measurement site or other sites if any radiologist at the site is  
583 unable to check the images. QC 3 is manually conducted by researchers at the measurement sites  
584 before uploading the data to a server for all images in reference to the HCP QC manual (Marcus  
585 et al., 2013). After uploading the images to the XNAT servers, all images are first checked  
586 according to the DICOM file information as to whether the images are correctly updated. The  
587 researchers at each site are informed of missing DICOM files and any irregular parameters

588 detected in the DICOM files. In QC 3, the T1w and T2w images are manually checked as to  
589 whether the face images are completely removed. Then, signal distributions of the myelin map  
590 are checked for outliers because of its sensitivity to several artifacts and errors such as motion,  
591 reconstruction of the images, and cortical surface reconstruction. Functional and diffusion  
592 images are automatically checked for outliers, and the images and data will be checked by visual  
593 inspection. In the QC 3 process, a QC pipeline will be implemented for checking the images  
594 (Marcus et al., 2013). QC 4 uses preprocessed CIFTI images that will be checked in several  
595 preprocessing steps. Any irregular scans and remarks are recorded in the clinical data servers and  
596 the information will be used when determining the eligibility criteria for each study.

597

## 598 *2.6. Ethical regulation*

599 Sharing neuropsychiatric patient data, which may contain information linked to subjects'  
600 privacy, requires special attention (Sadato et al., 2019). Therefore, the Brain/MINDS Beyond  
601 project put NCNP as the core site for supporting ethical considerations. Before participating in  
602 the project, all institutions are required to receive approval from their ethical review board  
603 regarding their research plans. This includes the following points and ethical documentation: 1)  
604 MR images and clinical data of the participants may be shared within the Brain/MINDS Beyond  
605 project or Japanese/International scientific institutions for collaboration. De-identified MR  
606 images with limited clinical data (see below) may become publicly accessible on an open  
607 database for research purposes. 2) MR images of the participants may be compared with non-  
608 human primate MRI data. 3) Intellectual property rights originating from the research of the  
609 Brain/MINDS Beyond project shall be attributed to the institutes of the researchers and not the

610 participants. All participants must provide written informed consent to participate in this project  
611 after receiving a complete explanation of the experiment.

612         The Japanese regulations for the sharing of personal information used for research  
613 purposes requires attention in dealing with two types of data: “individual identification codes”  
614 and “special care-required personal information”  
615 (<http://www.japaneselawtranslation.go.jp/law/detail/?id=2781&vm=04&re=01>). Individual  
616 identification codes are direct identifiers—information sufficient to identify a specific individual.  
617 Special care-required personal information represents indirect identifiers needing special care in  
618 handling so as not to cause potential disadvantages to participants. In consideration of these  
619 regulations, data accompanied with the MR images are limited in the publicly accessible open  
620 database, and only include 5-year age bins, sex, diagnostic information, handedness, simple  
621 socioeconomic status, clinical scale scores, and sleepiness scale scores. In the Brain/MINDS  
622 Beyond project, we exclude the datasets of MR images containing facial information from the  
623 data in the publicly accessible open database.

624

## 625 *2.7. Data sharing*

626 In the current provisional plan of sharing the collected data, we have designated three types of  
627 data sharing:

628 1) Access via an open database: de-identified MR images and limited clinical data are to become  
629 publicly accessible for research purposes after the research period ends. The initial release will  
630 be scheduled in 2024. Basic demographic and clinical characteristics such as 5-year age bin, sex,  
631 socioeconomic status, (premorbid) estimated intellectual quotient, main diagnosis, representative  
632 scale scores for each disease and sleepiness during rsfMRI scan will be shared.

633 2) Application-based sharing: MR images and the clinical datasets are shared after receiving  
634 application approval for data usage by the Brain/MINDS Beyond human brain MRI study  
635 working group. Applicants are required to obtain approval of their research plan from the ethical  
636 review board of their institution and request the dataset type in the application form. The  
637 working group discusses the eligibility of the applicants, as well as the availability of the  
638 requested dataset, the ethical consideration in the Brain/MINDS Beyond site(s), and any conflict  
639 from other applications. Data is released from the distribution server of the Brain/MINDS  
640 Beyond project with limited access.

641 3) Collaboration-based sharing: This form of sharing is used for individual collaborative studies.  
642 A research proposal collaborating with the institute(s) in the Brain/MINDS Beyond project is  
643 approved by the ethical review board of the institute(s). Data is shared from the relevant  
644 institute(s).

### 645 **3. Discussion**

646 The Brain/MINDS Beyond human brain MRI study expands upon research from previous multi-  
647 site neuroimaging studies in Japan and provides high quality brain images by standardizing  
648 multiple MRI scanners and protocols. An unbiased and quantitative assessment of cortical  
649 structure and function may be needed for sensitive and specific predictions of any dynamics,  
650 perturbations, or disorders of the brain system. Multi-modal cross-disease image datasets are  
651 systematically and properly acquired, analyzed, and shared to enable investigation of common  
652 and disease-specific features for psychiatric and neurological disorders with a high sensitivity  
653 and specificity. A distinct feature of this project is to include a study design with the TS project,  
654 which enables harmonizing the multi-site data from lower (i.e. preprocessing) to higher levels  
655 (i.e. statistics). The harmonization protocols are available at <http://mriportal.umin.jp>. The  
656 Brain/MINDS Beyond human brain MRI project can provide brain imaging biomarkers that are  
657 applicable to therapeutic targets and diagnostic supports.

658 To date, several national projects have applied high-quality multimodal MRI protocols, in  
659 addition to a preprocessing pipeline, to a large cohort (e.g., HCP, UK biobank, and ABCD).  
660 Unlike these multi-site projects, we plan to investigate brain organization associated with brain  
661 disorders that occur throughout the lifespan and to develop imaging biomarkers that can be  
662 implemented in clinical trials. To facilitate the collection of a larger number of patients with  
663 different brain disorders, multiple clinical research sites are participating in this project and  
664 cooperating for standardized data acquisitions. The core of the project began from establishing a  
665 standardized protocol (i.e. HARP) based on five 3T MRI scanners, but it will continue to develop  
666 a comparable protocol for other types of scanners/vendors. The protocol is designed not only for  
667 high-resolution structural MRI and high-quality resting-state fMRI, but also for diffusion MRI

668 and other imaging—including scans for correcting distortions. The preprocessing is performed  
669 with a surface-based multi-modal analysis to minimize bias largely generated from the variability  
670 in cortical folding across subjects (Coalson et al., 2018; Glasser et al., 2016b). The preliminary  
671 data demonstrated high quality MRI images and the fidelity of structural and functional brain  
672 organizations across scanners/sites. The signal-to-noise ratio of MRI images was very high  
673 across scanners/sites (Figure 3A). The cortical metrics of structure (myelin map, thickness)  
674 (Figure 3B-C) were comparable to those previously reported in the literature (Fischl and Dale,  
675 2000; Glasser and Van Essen, 2011), as well as the functional connectivity related to eye  
676 movements involving FEF and PEF (Figure 6A) (Amiez and Petrides, 2009) and a language  
677 network involving left 55b, 44/45, STS, and PSL (Figure 6B) (Glasser et al., 2016a). These  
678 findings suggest that a surface-based parcellated analysis may provide useful and reliable metrics  
679 concerning cortical structure, function, and connectivity, and may potentially contribute to the  
680 establishment of multi-modal imaging biomarkers of brain disorders. The initial trial with 30 TS  
681 also demonstrated the highly reproducible and specific pattern of subject-wise connectome  
682 across five scanners, suggesting the reliability of our prospective harmonization (e.g. protocols  
683 and preprocessing) and promising future retrospective (i.e. statistical) harmonization. The  
684 residual bias of myelin map is presumably due to differences of transmit field across scans and  
685 needs to be corrected in future preprocessing pipeline.

686         The TS approach is a novel harmonization method for multi-site brain image data  
687 (Yamashita et al., 2019), which has proven that measurement bias from MRI equipment and  
688 protocols can be differentiated from sampling bias between sites. Instead of using a previously  
689 applied GLM, we plan to expand the statistical approach to a GLMM in this project. One of the  
690 obstacles of the GLMM approach is that it requires a larger number of total scans compared to

691 those in a GLM approach; overlapping scans at hub sites are required for all TS participants to  
692 ensure the data connectivity; additionally, a larger number of TS participants is required in the  
693 TS project because the degree of freedom can be reduced in the GLMM. However, one of the  
694 benefits of the GLMM approach includes that it is flexible with the variability in data  
695 acquisition—such as the number of scans per participant and length of scan time per protocol;  
696 thus, is suitable for a big project. Furthermore, this approach allows the addition of another site,  
697 scanner, and protocol to an existing TS network, which can deal with the future upgrades of  
698 scanners and protocols. In fact, the scanners at two sites (UHI and SWA) were upgraded to a  
699 MAGNETOM Skyra fit (Siemens Healthcare GmbH, Erlangen, Germany) for institutional  
700 reasons after the Brain/MINDS Beyond project had started. Therefore, we customized the TS for  
701 two sites to ensure that the data are properly connected before and after the upgrades. Also, the  
702 project welcomes other sites to participate in the TS network.

703         Because this project focuses on various brain disorders across the lifespan, we aim to  
704 identify common and disease-specific features of psychiatric and neurological disorders. While  
705 some case-control studies suggest possible neural mechanisms in a psychiatric disease, other  
706 studies suggest that the effects may not be specific to a single entity but instead may be shared  
707 across multiple neuropsychiatric disorders (Hibar et al., 2018; Schmaal et al., 2017; Schmaal et  
708 al., 2016; van Erp et al., 2016). Such non-specificity may be at least partly addressed by  
709 investigating diseases across the lifespan, since some of brain changes reported in psychiatric  
710 disorders also occur in aging or development in healthy subjects, e.g. volumetric changes in  
711 subcortical structures in schizophrenia (Okada et al., 2016; van Erp et al., 2016) and in healthy  
712 aging (O'Shea et al., 2016; Wang et al., 2019). We initially coordinated with 13 sites to explore  
713 various psychiatric and neurological disorders throughout the lifespan and to make use of a

714 powerful harmonization method. Therefore, this project aims to identify both the common and  
715 disease-specific pathophysiology features of psychiatric and neurological disorders, which will  
716 hopefully lead to imaging biomarkers for general clinical practice and the development of  
717 candidate therapeutic targets for future clinical trials.

718         We established task fMRI scans using EMOTION and CARIT in HARP to evaluate the  
719 validity, reliability and applicability of harmonization. The result of task fMRI may be used for  
720 validation of the resting-state fMRI based cortical surface registration, and parcellation. The TS  
721 project performing task fMRI is now under planning and hopefully will be completed in coming  
722 years.

723         In conclusion, the Brain/MINDS Beyond human brain MRI project began with the  
724 participation of 13 clinical research sites—all of which have setup brain image scans using the  
725 standard MRI scanners and protocols, conducted TS scans, and will share acquired data with the  
726 project and the public in the future, and commit to the analysis and publication of the data. To  
727 the best of our knowledge, this is the first human brain MRI project to explore psychiatric and  
728 neurological disorders across the lifespan. The project aims to discover robust findings which  
729 may be directly related to the common or disease-specific pathophysiology features of such  
730 diseases and facilitate the development of candidate biomarkers for clinical application and drug  
731 discovery.



732 **Acknowledgment**

733 This research was supported by the Agency for Medical Research and Development (AMED)  
734 under Grant Numbers JP20dm0307001 (K.K.), JP20dm0307002 (Y.O.), JP20dm0307003  
735 (T.Han.), JP20dm0307004 (K.K.), JP20dm0307008 (M.K.), JP20dm`0307020 (N.S.),  
736 JP20dm0207069 (S.K.) and JP20dm0307006 (T.Hay.). This study was also supported by the  
737 University of Tokyo Center for Integrative Science of Human Behaviour (CiSHuB) and the  
738 International Research Center for Neurointelligence (WPI-IRCN) at the University of Tokyo  
739 Institutes for Advanced Study (UTIAS).

740

741 **Author Contributions**

742 Shinsuke Koike, Conceptualization, Project administration, Funding acquisition, Writing –  
743 original draft, Software, Resources.

744 Saori C Tanaka, Conceptualization, Project administration, Data Curation, Software, Resources,  
745 Writing – original draft.

746 Tomohisa Okada, Methodology, Investigation.

747 Toshihiko Aso, Investigation, Formal Analysis, Validation.

748 Michiko Asano, Investigation, Data curation.

749 Norihide Maikusa, Methodology, Resources.

750 Kentaro Morita, Writing – original draft.

751 Naohiro Okada, Investigation, Writing – original draft.

752 Masaki Fukunaga, Methodology.

753 Akiko Uematsu, Methodology, Investigation.

754 Hiroki Togo, Methodology, Investigation.

- 755 Atsushi Miyazaki, Methodology, Investigation.
- 756 Katsutoshi Murata, Methodology.
- 757 Yuta Urushibata, Methodology.
- 758 Joonas Autio, Methodology.
- 759 Takayuki Ose, Methodology.
- 760 Junichiro Yoshimoto, Methodology.
- 761 Toshiyuki Araki, Writing – original draft.
- 762 Matthew F Glasser, Software, Writing - reviewing and editing.
- 763 David C Van Essen, Writing – reviewing and editing.
- 764 Megumi Maruyama, Project administration.
- 765 Norihiro Sadato, Investigation, Funding acquisition, Project administration.
- 766 Mitsuo Kawato, Conceptualization, Funding acquisition, Project administration.
- 767 Kiyoto Kasai, Investigation, Funding acquisition, Project administration, Supervision.
- 768 Yasumasa Okamoto, Investigation, Funding acquisition.
- 769 Takashi Hanakawa, Project administration, Funding Acquisition, Methodology, Investigation,  
770 Resources, Writing – original draft.
- 771 Takuya Hayashi, Conceptualization, Project administration, Funding Acquisition, Software,  
772 Resources, Formal Analysis, Writing - original draft, reviewing and editing.
- 773
- 774 **Conflict of interest**
- 775 Katsutoshi Murata and Yuta Urushibara are employed by Siemens Healthcare K.K., Tokyo,  
776 Japan. The other authors report no financial relationships with commercial interests.
- 777

778 **Data availability**

779 The data presented in Figure 3 and 6 are available at BALSAs  
780 (<https://balsa.wustl.edu/study/show/npD26>). Harmonization protocols and other information of the  
781 project are available at the BrainMINDS beyond MRI portal site  
782 (<http://mriportal.umin.jp/?lang=en>). The tool for DICOM to NIFTI conversion, folder structure,  
783 derivation of imaging parameters is available at [https://github.com/RIKEN-](https://github.com/RIKEN-BCIL/BCILDCMCONVERT)  
784 [BCIL/BCILDCMCONVERT](#), See also Data sharing section in details of data obtained in future in  
785 this project. For proposal and requests for the data usage, please contact to Saori Tanaka  
786 ([xsaori@atr.jp](mailto:xsaori@atr.jp)).

## 787 **References**

- 788 Amiez, C., Petrides, M., 2009. Anatomical organization of the eye fields in the human and non-human  
789 primate frontal cortex. *Prog Neurobiol* 89, 220-230.
- 790 Andersson, J.L., Skare, S., Ashburner, J., 2003. How to correct susceptibility distortions in spin-echo  
791 echo-planar images: application to diffusion tensor imaging. *Neuroimage* 20, 870-888.
- 792 Andersson, J.L.R., Graham, M.S., Drobnyak, I., Zhang, H., Campbell, J., 2018. Susceptibility-induced  
793 distortion that varies due to motion: Correction in diffusion MR without acquiring additional data.  
794 *Neuroimage* 171, 277-295.
- 795 Andersson, J.L.R., Graham, M.S., Drobnyak, I., Zhang, H., Filippini, N., Bastiani, M., 2017. Towards a  
796 comprehensive framework for movement and distortion correction of diffusion MR images: Within  
797 volume movement. *Neuroimage* 152, 450-466.
- 798 Andersson, J.L.R., Sotiropoulos, S.N., 2016. An integrated approach to correction for off-resonance  
799 effects and subject movement in diffusion MR imaging. *Neuroimage* 125, 1063-1078.
- 800 Ando, S., Nishida, A., Yamasaki, S., Koike, S., Morimoto, Y., Hoshino, A., Kanata, S., Fujikawa, S.,  
801 Endo, K., Usami, S., Furukawa, T.A., Hiraiwa-Hasegawa, M., Kasai, K., Scientific, T.T.C., Data  
802 Collection, T., 2019. Cohort Profile: The Tokyo Teen Cohort study (TTC). *Int J Epidemiol* 48, 1414-  
803 1414g.
- 804 Beheshti, I., Maikusa, N., Daneshmand, M., Matsuda, H., Demirel, H., Anbarjafari, G., Japanese-  
805 Alzheimer's Disease Neuroimaging, I., 2017. Classification of Alzheimer's Disease and Prediction of  
806 Mild Cognitive Impairment Conversion Using Histogram-Based Analysis of Patient-Specific  
807 Anatomical Brain Connectivity Networks. *J Alzheimers Dis* 60, 295-304.
- 808 Behrens, T.E., Woolrich, M.W., Jenkinson, M., Johansen-Berg, H., Nunes, R.G., Clare, S., Matthews,  
809 P.M., Brady, J.M., Smith, S.M., 2003. Characterization and propagation of uncertainty in diffusion-  
810 weighted MR imaging. *Magn Reson Med* 50, 1077-1088.
- 811 Bookheimer, S.Y., Salat, D.H., Terpstra, M., Ances, B.M., Barch, D.M., Buckner, R.L., Burgess, G.C.,  
812 Curtiss, S.W., Diaz-Santos, M., Elam, J.S., Fischl, B., Greve, D.N., Hagy, H.A., Harms, M.P., Hatch,  
813 O.M., Hedden, T., Hodge, C., Japardi, K.C., Kuhn, T.P., Ly, T.K., Smith, S.M., Somerville, L.H.,  
814 Ugurbil, K., van der Kouwe, A., Van Essen, D., Woods, R.P., Yacoub, E., 2019. The Lifespan  
815 Human Connectome Project in Aging: An overview. *Neuroimage* 185, 335-348.
- 816 Casey, B.J., Cannonier, T., Conley, M.I., Cohen, A.O., Barch, D.M., Heitzeg, M.M., Soules, M.E.,  
817 Teslovich, T., Dellarco, D.V., Garavan, H., Orr, C.A., Wager, T.D., Banich, M.T., Speer, N.K.,  
818 Sutherland, M.T., Riedel, M.C., Dick, A.S., Bjork, J.M., Thomas, K.M., Charani, B., Mejia, M.H.,  
819 Hagler, D.J., Jr., Daniela Cornejo, M., Sicut, C.S., Harms, M.P., Dosenbach, N.U.F., Rosenberg, M.,  
820 Earl, E., Bartsch, H., Watts, R., Polimeni, J.R., Kuperman, J.M., Fair, D.A., Dale, A.M., Workgroup,  
821 A.I.A., 2018. The Adolescent Brain Cognitive Development (ABCD) study: Imaging acquisition  
822 across 21 sites. *Dev Cogn Neurosci* 32, 43-54.
- 823 Coalson, T.S., Van Essen, D.C., Glasser, M.F., 2018. The impact of traditional neuroimaging methods on  
824 the spatial localization of cortical areas. *Proc Natl Acad Sci U S A* 115, E6356-E6365.
- 825 Degenhardt, L., Chiu, W.T., Sampson, N., Kessler, R.C., Anthony, J.C., Angermeyer, M., Bruffaerts, R.,  
826 de Girolamo, G., Gureje, O., Huang, Y., Karam, A., Kostyuchenko, S., Lepine, J.P., Mora, M.E.,  
827 Neumark, Y., Ormel, J.H., Pinto-Meza, A., Posada-Villa, J., Stein, D.J., Takeshima, T., Wells, J.E.,  
828 2008. Toward a global view of alcohol, tobacco, cannabis, and cocaine use: findings from the WHO  
829 World Mental Health Surveys. *PLoS Med* 5, e141.
- 830 Donahue, C.J., Sotiropoulos, S.N., Jbabdi, S., Hernandez-Fernandez, M., Behrens, T.E., Dyrby, T.B.,  
831 Coalson, T., Kennedy, H., Knoblauch, K., Van Essen, D.C., Glasser, M.F., 2016. Using Diffusion  
832 Tractography to Predict Cortical Connection Strength and Distance: A Quantitative Comparison with  
833 Tracers in the Monkey. *J Neurosci* 36, 6758-6770.
- 834 Drysdale, A.T., Grosenick, L., Downar, J., Dunlop, K., Mansouri, F., Meng, Y., Fetcho, R.N., Zebley, B.,  
835 Oathes, D.J., Etkin, A., Schatzberg, A.F., Sudheimer, K., Keller, J., Mayberg, H.S., Gunning, F.M.,  
836 Alexopoulos, G.S., Fox, M.D., Pascual-Leone, A., Voss, H.U., Casey, B.J., Dubin, M.J., Liston, C.,

- 837 2017. Resting-state connectivity biomarkers define neurophysiological subtypes of depression. *Nat*  
838 *Med* 23, 28-38.
- 839 Elliott, L.T., Sharp, K., Alfaro-Almagro, F., Shi, S., Miller, K.L., Douaud, G., Marchini, J., Smith, S.M.,  
840 2018a. Genome-wide association studies of brain imaging phenotypes in UK Biobank. *Nature* 562,  
841 210-216.
- 842 Elliott, M.L., Romer, A., Knodt, A.R., Hariri, A.R., 2018b. A Connectome-wide Functional Signature of  
843 Transdiagnostic Risk for Mental Illness. *Biol Psychiatry* 84, 452-459.
- 844 Fischl, B., 2012. FreeSurfer. *Neuroimage* 62, 774-781.
- 845 Fischl, B., Dale, A.M., 2000. Measuring the thickness of the human cerebral cortex from magnetic  
846 resonance images. *Proc Natl Acad Sci U S A* 97, 11050-11055.
- 847 Fortin, J.P., Cullen, N., Sheline, Y.I., Taylor, W.D., Aselcioglu, I., Cook, P.A., Adams, P., Cooper, C.,  
848 Fava, M., McGrath, P.J., McInnis, M., Phillips, M.L., Trivedi, M.H., Weissman, M.M., Shinohara,  
849 R.T., 2018. Harmonization of cortical thickness measurements across scanners and sites. *Neuroimage*  
850 167, 104-120.
- 851 Fortin, J.P., Parker, D., Tunc, B., Watanabe, T., Elliott, M.A., Ruparel, K., Roalf, D.R., Satterthwaite,  
852 T.D., Gur, R.C., Gur, R.E., Schultz, R.T., Verma, R., Shinohara, R.T., 2017. Harmonization of multi-  
853 site diffusion tensor imaging data. *Neuroimage* 161, 149-170.
- 854 Fukutomi, H., Glasser, M.F., Zhang, H., Autio, J.A., Coalson, T.S., Okada, T., Togashi, K., Van Essen,  
855 D.C., Hayashi, T., 2018. Neurite imaging reveals microstructural variations in human cerebral  
856 cortical gray matter. *Neuroimage* 182, 488-499.
- 857 Glasser, M.F., Coalson, T.S., Robinson, E.C., Hacker, C.D., Harwell, J., Yacoub, E., Ugurbil, K.,  
858 Andersson, J., Beckmann, C.F., Jenkinson, M., Smith, S.M., Van Essen, D.C., 2016a. A multi-modal  
859 parcellation of human cerebral cortex. *Nature* 536, 171-178.
- 860 Glasser, M.F., Smith, S.M., Marcus, D.S., Andersson, J.L., Auerbach, E.J., Behrens, T.E., Coalson, T.S.,  
861 Harms, M.P., Jenkinson, M., Moeller, S., Robinson, E.C., Sotiropoulos, S.N., Xu, J., Yacoub, E.,  
862 Ugurbil, K., Van Essen, D.C., 2016b. The Human Connectome Project's neuroimaging approach. *Nat*  
863 *Neurosci* 19, 1175-1187.
- 864 Glasser, M.F., Sotiropoulos, S.N., Wilson, J.A., Coalson, T.S., Fischl, B., Andersson, J.L., Xu, J., Jbabdi,  
865 S., Webster, M., Polimeni, J.R., Van Essen, D.C., Jenkinson, M., Consortium, W.U.-M.H., 2013. The  
866 minimal preprocessing pipelines for the Human Connectome Project. *Neuroimage* 80, 105-124.
- 867 Glasser, M.F., Van Essen, D.C., 2011. Mapping human cortical areas in vivo based on myelin content as  
868 revealed by T1- and T2-weighted MRI. *J Neurosci* 31, 11597-11616.
- 869 Harms, M.P., Somerville, L.H., Ances, B.M., Andersson, J., Barch, D.M., Bastiani, M., Bookheimer,  
870 S.Y., Brown, T.B., Buckner, R.L., Burgess, G.C., Coalson, T.S., Chappell, M.A., Dapretto, M.,  
871 Douaud, G., Fischl, B., Glasser, M.F., Greve, D.N., Hodge, C., Jamison, K.W., Jbabdi, S., Kandala,  
872 S., Li, X., Mair, R.W., Mangia, S., Marcus, D., Mascalci, D., Moeller, S., Nichols, T.E., Robinson,  
873 E.C., Salat, D.H., Smith, S.M., Sotiropoulos, S.N., Terpstra, M., Thomas, K.M., Tisdall, M.D.,  
874 Ugurbil, K., van der Kouwe, A., Woods, R.P., Zollei, L., Van Essen, D.C., Yacoub, E., 2018.  
875 Extending the Human Connectome Project across ages: Imaging protocols for the Lifespan  
876 Development and Aging projects. *Neuroimage* 183, 972-984.
- 877 Hibar, D.P., Westlye, L.T., Doan, N.T., Jahanshad, N., Cheung, J.W., Ching, C.R.K., Versace, A.,  
878 Bilderbeck, A.C., Uhlmann, A., Mwangi, B., Kramer, B., Overs, B., Hartberg, C.B., Abe, C., Dima,  
879 D., Grotegerd, D., Sprooten, E., Boen, E., Jimenez, E., Howells, F.M., Delvecchio, G., Temmingh,  
880 H., Starke, J., Almeida, J.R.C., Goikolea, J.M., Houenou, J., Beard, L.M., Rauer, L., Abramovic, L.,  
881 Bonnin, M., Ponteduro, M.F., Keil, M., Rive, M.M., Yao, N., Yalin, N., Najt, P., Rosa, P.G., Redlich,  
882 R., Trost, S., Hagenaars, S., Fears, S.C., Alonso-Lana, S., van Erp, T.G.M., Nickson, T., Chaim-  
883 Avancini, T.M., Meier, T.B., Elvsashagen, T., Haukvik, U.K., Lee, W.H., Schene, A.H., Lloyd, A.J.,  
884 Young, A.H., Nugent, A., Dale, A.M., Pfennig, A., McIntosh, A.M., Lafer, B., Baune, B.T., Ekman,  
885 C.J., Zarate, C.A., Bearden, C.E., Henry, C., Simhandl, C., McDonald, C., Bourne, C., Stein, D.J.,  
886 Wolf, D.H., Cannon, D.M., Glahn, D.C., Veltman, D.J., Pomarol-Clotet, E., Vieta, E., Canales-  
887 Rodriguez, E.J., Nery, F.G., Duran, F.L.S., Busatto, G.F., Roberts, G., Pearlson, G.D., Goodwin,

- 888 G.M., Kugel, H., Whalley, H.C., Ruhe, H.G., Soares, J.C., Fullerton, J.M., Rybakowski, J.K., Savitz,  
889 J., Chaim, K.T., Fatjo-Vilas, M., Soeiro-de-Souza, M.G., Boks, M.P., Zanetti, M.V., Otaduy, M.C.G.,  
890 Schaufelberger, M.S., Alda, M., Ingvar, M., Phillips, M.L., Kempton, M.J., Bauer, M., Landen, M.,  
891 Lawrence, N.S., van Haren, N.E.M., Horn, N.R., Freimer, N.B., Gruber, O., Schofield, P.R.,  
892 Mitchell, P.B., Kahn, R.S., Lenroot, R., Machado-Vieira, R., Ophoff, R.A., Sarro, S., Frangou, S.,  
893 Satterthwaite, T.D., Hajek, T., Dannlowski, U., Malt, U.F., Arolt, V., Gattaz, W.F., Drevets, W.C.,  
894 Caseras, X., Agartz, I., Thompson, P.M., Andreassen, O.A., 2018. Cortical abnormalities in bipolar  
895 disorder: an MRI analysis of 6503 individuals from the ENIGMA Bipolar Disorder Working Group.  
896 *Mol Psychiatry* 23, 932-942.
- 897 Iwatsubo, T., Iwata, A., Suzuki, K., Ihara, R., Arai, H., Ishii, K., Senda, M., Ito, K., Ikeuchi, T., Kuwano,  
898 R., Matsuda, H., Japanese Alzheimer's Disease Neuroimaging, I., Sun, C.K., Beckett, L.A., Petersen,  
899 R.C., Weiner, M.W., Aisen, P.S., Donohue, M.C., Alzheimer's Disease Neuroimaging, I., 2018.  
900 Japanese and North American Alzheimer's Disease Neuroimaging Initiative studies: Harmonization  
901 for international trials. *Alzheimers Dement* 14, 1077-1087.
- 902 Koike, S., Takano, Y., Iwashiro, N., Satomura, Y., Suga, M., Nagai, T., Natsubori, T., Tada, M.,  
903 Nishimura, Y., Yamasaki, S., Takizawa, R., Yahata, N., Araki, T., Yamasue, H., Kasai, K., 2013. A  
904 multimodal approach to investigate biomarkers for psychosis in a clinical setting: the Integrative  
905 Neuroimaging studies in Schizophrenia Targeting for Early intervention and Prevention (IN-STEP)  
906 project *Schizophr Res* 143, 116-124.
- 907 Koutsouleris, N., Meisenzahl, E.M., Borgwardt, S., Riecher-Rossler, A., Frodl, T., Kambeitz, J., Kohler,  
908 Y., Falkai, P., Moller, H.J., Reiser, M., Davatzikos, C., 2015. Individualized differential diagnosis of  
909 schizophrenia and mood disorders using neuroanatomical biomarkers. *Brain* 138, 2059-2073.
- 910 Lee, T.Y., Kwon, J.S., 2016. Psychosis research in Asia: advantage from low prevalence of cannabis use.  
911 *NPJ Schizophr* 2, 1.
- 912 Marcus, D.S., Harms, M.P., Snyder, A.Z., Jenkinson, M., Wilson, J.A., Glasser, M.F., Barch, D.M.,  
913 Archie, K.A., Burgess, G.C., Ramaratnam, M., Hodge, M., Horton, W., Herrick, R., Olsen, T.,  
914 McKay, M., House, M., Hileman, M., Reid, E., Harwell, J., Coalson, T., Schindler, J., Elam, J.S.,  
915 Curtiss, S.W., Van Essen, D.C., Consortium, W.U.-M.H., 2013. Human Connectome Project  
916 informatics: quality control, database services, and data visualization. *Neuroimage* 80, 202-219.
- 917 Miller, K.L., Alfaro-Almagro, F., Bangerter, N.K., Thomas, D.L., Yacoub, E., Xu, J., Bartsch, A.J.,  
918 Jbabdi, S., Sotiropoulos, S.N., Andersson, J.L., Griffanti, L., Douaud, G., Okell, T.W., Weale, P.,  
919 Dragonu, I., Garratt, S., Hudson, S., Collins, R., Jenkinson, M., Matthews, P.M., Smith, S.M., 2016.  
920 Multimodal population brain imaging in the UK Biobank prospective epidemiological study. *Nat*  
921 *Neurosci* 19, 1523-1536.
- 922 Moeller, S., Yacoub, E., Olman, C.A., Auerbach, E., Strupp, J., Harel, N., Ugurbil, K., 2010. Multiband  
923 multislice GE-EPI at 7 tesla, with 16-fold acceleration using partial parallel imaging with application  
924 to high spatial and temporal whole-brain fMRI. *Magn Reson Med* 63, 1144-1153.
- 925 Mueller, S.G., Weiner, M.W., Thal, L.J., Petersen, R.C., Jack, C., Jagust, W., Trojanowski, J.Q., Toga,  
926 A.W., Beckett, L., 2005. The Alzheimer's disease neuroimaging initiative. *Neuroimaging Clin N Am*  
927 15, 869-877, xi-xii.
- 928 Mukai, Y., Murata, M., 2017. Japan Parkinson's Progression Markers Initiative (J-PPMI). *Nihon Rinsho*  
929 75, 151-155.
- 930 Murray, C.J., Vos, T., Lozano, R., Naghavi, M., Flaxman, A.D., Michaud, C., Ezzati, M., Shibuya, K.,  
931 Salomon, J.A., Abdalla, S., Aboyans, V., Abraham, J., Ackerman, I., Aggarwal, R., Ahn, S.Y., Ali,  
932 M.K., Alvarado, M., Anderson, H.R., Anderson, L.M., Andrews, K.G., Atkinson, C., Baddour, L.M.,  
933 Bahalim, A.N., Barker-Collo, S., Barrero, L.H., Bartels, D.H., Basanez, M.G., Baxter, A., Bell, M.L.,  
934 Benjamin, E.J., Bennett, D., Bernabe, E., Bhalla, K., Bhandari, B., Bikbov, B., Bin Abdulhak, A.,  
935 Birbeck, G., Black, J.A., Blencowe, H., Blore, J.D., Blyth, F., Bolliger, I., Bonaventure, A., Boufous,  
936 S., Bourne, R., Boussinesq, M., Braithwaite, T., Brayne, C., Bridgett, L., Brooker, S., Brooks, P.,  
937 Brugha, T.S., Bryan-Hancock, C., Bucello, C., Buchbinder, R., Buckle, G., Budke, C.M., Burch, M.,  
938 Burney, P., Burstein, R., Calabria, B., Campbell, B., Canter, C.E., Carabin, H., Carapetis, J.,

939 Carmona, L., Cella, C., Charlson, F., Chen, H., Cheng, A.T., Chou, D., Chugh, S.S., Coffeng, L.E.,  
940 Colan, S.D., Colquhoun, S., Colson, K.E., Condon, J., Connor, M.D., Cooper, L.T., Corriere, M.,  
941 Cortinovis, M., de Vaccaro, K.C., Couser, W., Cowie, B.C., Criqui, M.H., Cross, M., Dabhadkar,  
942 K.C., Dahiya, M., Dahodwala, N., Damsere-Derry, J., Danaei, G., Davis, A., De Leo, D., Degenhardt,  
943 L., Dellavalle, R., Delossantos, A., Denenberg, J., Derrett, S., Des Jarlais, D.C., Dharmaratne, S.D.,  
944 Dherani, M., Diaz-Torne, C., Dolk, H., Dorsey, E.R., Driscoll, T., Duber, H., Ebel, B., Edmond, K.,  
945 Elbaz, A., Ali, S.E., Erskine, H., Erwin, P.J., Espindola, P., Ewoigbokhan, S.E., Farzadfar, F., Feigin,  
946 V., Felson, D.T., Ferrari, A., Ferri, C.P., Fevre, E.M., Finucane, M.M., Flaxman, S., Flood, L.,  
947 Foreman, K., Forouzanfar, M.H., Fowkes, F.G., Fransen, M., Freeman, M.K., Gabbe, B.J., Gabriel,  
948 S.E., Gakidou, E., Ganatra, H.A., Garcia, B., Gaspari, F., Gillum, R.F., Gmel, G., Gonzalez-Medina,  
949 D., Gosselin, R., Grainger, R., Grant, B., Groeger, J., Guillemin, F., Gunnell, D., Gupta, R.,  
950 Haagsma, J., Hagan, H., Halasa, Y.A., Hall, W., Haring, D., Haro, J.M., Harrison, J.E., Havmoeller,  
951 R., Hay, R.J., Higashi, H., Hill, C., Hoen, B., Hoffman, H., Hotez, P.J., Hoy, D., Huang, J.J.,  
952 Ibeanusi, S.E., Jacobsen, K.H., James, S.L., Jarvis, D., Jasrasaria, R., Jayaraman, S., Johns, N., Jonas,  
953 J.B., Karthikeyan, G., Kassebaum, N., Kawakami, N., Keren, A., Khoo, J.P., King, C.H., Knowlton,  
954 L.M., Kobusingye, O., Koranteng, A., Krishnamurthi, R., Laden, F., Lalloo, R., Laslett, L.L.,  
955 Lathlean, T., Leasher, J.L., Lee, Y.Y., Leigh, J., Levinson, D., Lim, S.S., Limb, E., Lin, J.K.,  
956 Lipnick, M., Lipshultz, S.E., Liu, W., Loane, M., Ohno, S.L., Lyons, R., Mabweijano, J., MacIntyre,  
957 M.F., Malekzadeh, R., Mallinger, L., Manivannan, S., Marcenes, W., March, L., Margolis, D.J.,  
958 Marks, G.B., Marks, R., Matsumori, A., Matzopoulos, R., Mayosi, B.M., McAnulty, J.H.,  
959 McDermott, M.M., McGill, N., McGrath, J., Medina-Mora, M.E., Meltzer, M., Mensah, G.A.,  
960 Merriman, T.R., Meyer, A.C., Miglioli, V., Miller, M., Miller, T.R., Mitchell, P.B., Mock, C.,  
961 Mocumbi, A.O., Moffitt, T.E., Mokdad, A.A., Monasta, L., Montico, M., Moradi-Lakeh, M., Moran,  
962 A., Morawska, L., Mori, R., Murdoch, M.E., Mwaniki, M.K., Naidoo, K., Nair, M.N., Naldi, L.,  
963 Narayan, K.M., Nelson, P.K., Nelson, R.G., Nevitt, M.C., Newton, C.R., Nolte, S., Norman, P.,  
964 Norman, R., O'Donnell, M., O'Hanlon, S., Olives, C., Omer, S.B., Ortblad, K., Osborne, R., Ozgediz,  
965 D., Page, A., Pahari, B., Pandian, J.D., Rivero, A.P., Patten, S.B., Pearce, N., Padilla, R.P., Perez-  
966 Ruiz, F., Perico, N., Pesudovs, K., Phillips, D., Phillips, M.R., Pierce, K., Pion, S., Polanczyk, G.V.,  
967 Polinder, S., Pope, C.A., 3rd, Popova, S., Porrini, E., Pourmalek, F., Prince, M., Pullan, R.L.,  
968 Ramaiah, K.D., Ranganathan, D., Razavi, H., Regan, M., Rehm, J.T., Rein, D.B., Remuzzi, G.,  
969 Richardson, K., Rivara, F.P., Roberts, T., Robinson, C., De Leon, F.R., Ronfani, L., Room, R.,  
970 Rosenfeld, L.C., Rushton, L., Sacco, R.L., Saha, S., Sampson, U., Sanchez-Riera, L., Sanman, E.,  
971 Schwebel, D.C., Scott, J.G., Segui-Gomez, M., Shahraz, S., Shepard, D.S., Shin, H., Shivakoti, R.,  
972 Singh, D., Singh, G.M., Singh, J.A., Singleton, J., Sleet, D.A., Sliwa, K., Smith, E., Smith, J.L.,  
973 Stapelberg, N.J., Steer, A., Steiner, T., Stolk, W.A., Stovner, L.J., Sudfeld, C., Syed, S., Tamburlini,  
974 G., Tavakkoli, M., Taylor, H.R., Taylor, J.A., Taylor, W.J., Thomas, B., Thomson, W.M., Thurston,  
975 G.D., Tleyjeh, I.M., Tonelli, M., Towbin, J.A., Truelsen, T., Tsilimbaris, M.K., Ubeda, C.,  
976 Undurraga, E.A., van der Werf, M.J., van Os, J., Vavilala, M.S., Venketasubramanian, N., Wang, M.,  
977 Wang, W., Watt, K., Weatherall, D.J., Weinstock, M.A., Weintraub, R., Weisskopf, M.G.,  
978 Weissman, M.M., White, R.A., Whiteford, H., Wiebe, N., Wiersma, S.T., Wilkinson, J.D., Williams,  
979 H.C., Williams, S.R., Witt, E., Wolfe, F., Woolf, A.D., Wulf, S., Yeh, P.H., Zaidi, A.K., Zheng, Z.J.,  
980 Zonies, D., Lopez, A.D., AlMazroa, M.A., Memish, Z.A., 2012. Disability-adjusted life years  
981 (DALYs) for 291 diseases and injuries in 21 regions, 1990-2010: a systematic analysis for the Global  
982 Burden of Disease Study 2010. *Lancet* 380, 2197-2223.

983 Nunes, A., Schnack, H.G., Ching, C.R.K., Agartz, I., Akudjedu, T.N., Alda, M., Alnaes, D., Alonso-Lana,  
984 S., Bauer, J., Baune, B.T., Boen, E., Bonnin, C.D.M., Busatto, G.F., Canales-Rodriguez, E.J.,  
985 Cannon, D.M., Caseras, X., Chaim-Avancini, T.M., Dannlowski, U., Diaz-Zuluaga, A.M., Dietsche,  
986 B., Doan, N.T., Duchesnay, E., Elvsashagen, T., Emden, D., Eyler, L.T., Fatjo-Vilas, M., Favre, P.,  
987 Foley, S.F., Fullerton, J.M., Glahn, D.C., Goikolea, J.M., Grotegerd, D., Hahn, T., Henry, C., Hibar,  
988 D.P., Houenou, J., Howells, F.M., Jahanshad, N., Kaufmann, T., Kenney, J., Kircher, T.T.J., Krug,  
989 A., Lagerberg, T.V., Lenroot, R.K., Lopez-Jaramillo, C., Machado-Vieira, R., Malt, U.F., McDonald,

- 990 C., Mitchell, P.B., Mwangi, B., Nabulsi, L., Opel, N., Overs, B.J., Pineda-Zapata, J.A., Pomarol-  
991 Clotet, E., Redlich, R., Roberts, G., Rosa, P.G., Salvador, R., Satterthwaite, T.D., Soares, J.C., Stein,  
992 D.J., Temmingh, H.S., Trappenberg, T., Uhlmann, A., van Haren, N.E.M., Vieta, E., Westlye, L.T.,  
993 Wolf, D.H., Yuksel, D., Zanetti, M.V., Andreassen, O.A., Thompson, P.M., Hajek, T., Group,  
994 E.B.D.W., 2018. Using structural MRI to identify bipolar disorders - 13 site machine learning study  
995 in 3020 individuals from the ENIGMA Bipolar Disorders Working Group. *Mol Psychiatry*.
- 996 O'Shea, A., Cohen, R.A., Porges, E.C., Nissim, N.R., Woods, A.J., 2016. Cognitive Aging and the  
997 Hippocampus in Older Adults. *Front Aging Neurosci* 8, 298.
- 998 Okada, N., Ando, S., Sanada, M., Hirata-Mogi, S., Iijima, Y., Sugiyama, H., Shirakawa, T., Yamagishi,  
999 M., Kanehara, A., Morita, M., Yagi, T., Hayashi, N., Koshiyama, D., Morita, K., Sawada, K.,  
1000 Ikegame, T., Sugimoto, N., Toriyama, R., Masaoka, M., Fujikawa, S., Kanata, S., Tada, M., Kirihara,  
1001 K., Yahata, N., Araki, T., Jinde, S., Kano, Y., Koike, S., Endo, K., Yamasaki, S., Nishida, A.,  
1002 Hiraiwa-Hasegawa, M., Bundo, M., Iwamoto, K., Tanaka, S.C., Kasai, K., 2019. Population-  
1003 neuroscience study of the Tokyo TEEN Cohort (pn-TTC): Cohort longitudinal study to explore the  
1004 neurobiological substrates of adolescent psychological and behavioral development. *Psychiatry Clin*  
1005 *Neurosci* 73, 231-242.
- 1006 Okada, N., Fukunaga, M., Yamashita, F., Koshiyama, D., Yamamori, H., Ohi, K., Yasuda, Y., Fujimoto,  
1007 M., Watanabe, Y., Yahata, N., Nemoto, K., Hibar, D.P., van Erp, T.G., Fujino, H., Isobe, M.,  
1008 Isomura, S., Natsubori, T., Narita, H., Hashimoto, N., Miyata, J., Koike, S., Takahashi, T., Yamasue,  
1009 H., Matsuo, K., Onitsuka, T., Iidaka, T., Kawasaki, Y., Yoshimura, R., Watanabe, Y., Suzuki, M.,  
1010 Turner, J.A., Takeda, M., Thompson, P.M., Ozaki, N., Kasai, K., Hashimoto, R., 2016. Abnormal  
1011 asymmetries in subcortical brain volume in schizophrenia. *Mol Psychiatry* 21, 1460-1466.
- 1012 Parkinson Progression Marker Initiative, 2011. The Parkinson Progression Marker Initiative (PPMI). *Prog*  
1013 *Neurobiol* 95, 629-635.
- 1014 R Core Team, 2018. R: A language and environment for statistical computing. R Foundation for  
1015 Statistical Computing. Vienna, Austria.
- 1016 Robinson, E.C., Garcia, K., Glasser, M.F., Chen, Z., Coalson, T.S., Makropoulos, A., Bozek, J., Wright,  
1017 R., Schuh, A., Webster, M., Hutter, J., Price, A., Cordero Grande, L., Hughes, E., Tusor, N., Bayly,  
1018 P.V., Van Essen, D.C., Smith, S.M., Edwards, A.D., Hajnal, J., Jenkinson, M., Glocker, B., Rueckert,  
1019 D., 2018. Multimodal surface matching with higher-order smoothness constraints. *Neuroimage* 167,  
1020 453-465.
- 1021 Sadato, N., Morita, K., Kasai, K., Fukushi, T., Nakamura, K., Nakazawa, E., Okano, H., Okabe, S., 2019.  
1022 Neuroethical Issues of the Brain/MINDS Project of Japan. *Neuron* 101, 385-389.
- 1023 Salimi-Khorshidi, G., Douaud, G., Beckmann, C.F., Glasser, M.F., Griffanti, L., Smith, S.M., 2014.  
1024 Automatic denoising of functional MRI data: combining independent component analysis and  
1025 hierarchical fusion of classifiers. *Neuroimage* 90, 449-468.
- 1026 Schmaal, L., Hibar, D.P., Samann, P.G., Hall, G.B., Baune, B.T., Jahanshad, N., Cheung, J.W., van Erp,  
1027 T.G.M., Bos, D., Ikram, M.A., Vernooij, M.W., Niessen, W.J., Tiemeier, H., Hofman, A., Wittfeld,  
1028 K., Grabe, H.J., Janowitz, D., Bulow, R., Selonke, M., Volzke, H., Grotegerd, D., Dannlowski, U.,  
1029 Arolt, V., Opel, N., Heindel, W., Kugel, H., Hoehn, D., Czisch, M., Couvy-Duchesne, B., Renteria,  
1030 M.E., Strike, L.T., Wright, M.J., Mills, N.T., de Zubicaray, G.I., McMahon, K.L., Medland, S.E.,  
1031 Martin, N.G., Gillespie, N.A., Goya-Maldonado, R., Gruber, O., Kramer, B., Hatton, S.N.,  
1032 Lagopoulos, J., Hickie, I.B., Frodl, T., Carballedo, A., Frey, E.M., van Velzen, L.S., Penninx, B., van  
1033 Tol, M.J., van der Wee, N.J., Davey, C.G., Harrison, B.J., Mwangi, B., Cao, B., Soares, J.C., Veer,  
1034 I.M., Walter, H., Schoepf, D., Zurowski, B., Konrad, C., Schramm, E., Normann, C., Schnell, K.,  
1035 Sacchet, M.D., Gotlib, I.H., MacQueen, G.M., Godlewska, B.R., Nickson, T., McIntosh, A.M.,  
1036 Pappmeyer, M., Whalley, H.C., Hall, J., Sussmann, J.E., Li, M., Walter, M., Aftanas, L., Brack, I.,  
1037 Bokhan, N.A., Thompson, P.M., Veltman, D.J., 2017. Cortical abnormalities in adults and  
1038 adolescents with major depression based on brain scans from 20 cohorts worldwide in the ENIGMA  
1039 Major Depressive Disorder Working Group. *Mol Psychiatry* 22, 900-909.



- 1040 Schmaal, L., Veltman, D.J., van Erp, T.G., Samann, P.G., Frodl, T., Jahanshad, N., Loehrer, E., Tiemeier,  
1041 H., Hofman, A., Niessen, W.J., Vernooij, M.W., Ikram, M.A., Wittfeld, K., Grabe, H.J., Block, A.,  
1042 Hegenscheid, K., Volzke, H., Hoehn, D., Czisch, M., Lagopoulos, J., Hatton, S.N., Hickie, I.B.,  
1043 Goya-Maldonado, R., Kramer, B., Gruber, O., Couvy-Duchesne, B., Renteria, M.E., Strike, L.T.,  
1044 Mills, N.T., de Zubicaray, G.I., McMahon, K.L., Medland, S.E., Martin, N.G., Gillespie, N.A.,  
1045 Wright, M.J., Hall, G.B., MacQueen, G.M., Frey, E.M., Carballo, A., van Velzen, L.S., van Tol,  
1046 M.J., van der Wee, N.J., Veer, I.M., Walter, H., Schnell, K., Schramm, E., Normann, C., Schoepf, D.,  
1047 Konrad, C., Zurowski, B., Nickson, T., McIntosh, A.M., Pappmeyer, M., Whalley, H.C., Sussmann,  
1048 J.E., Godlewska, B.R., Cowen, P.J., Fischer, F.H., Rose, M., Penninx, B.W., Thompson, P.M., Hibar,  
1049 D.P., 2016. Subcortical brain alterations in major depressive disorder: findings from the ENIGMA  
1050 Major Depressive Disorder working group. *Mol Psychiatry* 21, 806-812.
- 1051 Setsompop, K., Gagoski, B.A., Polimeni, J.R., Witzel, T., Wedeen, V.J., Wald, L.L., 2012. Blipped-  
1052 controlled aliasing in parallel imaging for simultaneous multislice echo planar imaging with reduced  
1053 g-factor penalty. *Magn Reson Med* 67, 1210-1224.
- 1054 Smith, S.M., Nichols, T.E., Vidaurre, D., Winkler, A.M., Behrens, T.E., Glasser, M.F., Ugurbil, K.,  
1055 Barch, D.M., Van Essen, D.C., Miller, K.L., 2015. A positive-negative mode of population  
1056 covariation links brain connectivity, demographics and behavior. *Nat Neurosci* 18, 1565-1567.
- 1057 Somerville, L.H., Bookheimer, S.Y., Buckner, R.L., Burgess, G.C., Curtiss, S.W., Dapretto, M., Elam,  
1058 J.S., Gaffrey, M.S., Harms, M.P., Hodge, C., Kandala, S., Kastman, E.K., Nichols, T.E., Schlaggar,  
1059 B.L., Smith, S.M., Thomas, K.M., Yacoub, E., Van Essen, D.C., Barch, D.M., 2018. The Lifespan  
1060 Human Connectome Project in Development: A large-scale study of brain connectivity development  
1061 in 5-21 year olds. *Neuroimage* 183, 456-468.
- 1062 Sotiropoulos, S.N., Hernandez-Fernandez, M., Vu, A.T., Andersson, J.L., Moeller, S., Yacoub, E.,  
1063 Lenglet, C., Ugurbil, K., Behrens, T.E.J., Jbabdi, S., 2016. Fusion in diffusion MRI for improved  
1064 fibre orientation estimation: An application to the 3T and 7T data of the Human Connectome Project.  
1065 *Neuroimage* 134, 396-409.
- 1066 Tong, Q., He, H., Gong, T., Li, C., Liang, P., Qian, T., Sun, Y., Ding, Q., Li, K., Zhong, J., 2020.  
1067 Multicenter dataset of multi-shell diffusion MRI in healthy traveling adults with identical settings.  
1068 *Sci Data* 7, 157.
- 1069 van Erp, T.G., Hibar, D.P., Rasmussen, J.M., Glahn, D.C., Pearlson, G.D., Andreassen, O.A., Agartz, I.,  
1070 Westlye, L.T., Haukvik, U.K., Dale, A.M., Melle, I., Hartberg, C.B., Gruber, O., Kraemer, B., Zilles,  
1071 D., Donohoe, G., Kelly, S., McDonald, C., Morris, D.W., Cannon, D.M., Corvin, A., Machielsen,  
1072 M.W., Koenders, L., de Haan, L., Veltman, D.J., Satterthwaite, T.D., Wolf, D.H., Gur, R.C., Gur,  
1073 R.E., Potkin, S.G., Mathalon, D.H., Mueller, B.A., Preda, A., Macciardi, F., Ehrlich, S., Walton, E.,  
1074 Hass, J., Calhoun, V.D., Bockholt, H.J., Sponheim, S.R., Shoemaker, J.M., van Haren, N.E., Hulshoff  
1075 Pol, H.E., Ophoff, R.A., Kahn, R.S., Roiz-Santianez, R., Crespo-Facorro, B., Wang, L., Alpert, K.I.,  
1076 Jonsson, E.G., Dimitrova, R., Bois, C., Whalley, H.C., McIntosh, A.M., Lawrie, S.M., Hashimoto,  
1077 R., Thompson, P.M., Turner, J.A., 2016. Subcortical brain volume abnormalities in 2028 individuals  
1078 with schizophrenia and 2540 healthy controls via the ENIGMA consortium. *Mol Psychiatry* 21, 547-  
1079 553.
- 1080 Van Essen, D.C., Ugurbil, K., Auerbach, E., Barch, D., Behrens, T.E., Bucholz, R., Chang, A., Chen, L.,  
1081 Corbetta, M., Curtiss, S.W., Della Penna, S., Feinberg, D., Glasser, M.F., Harel, N., Heath, A.C.,  
1082 Larson-Prior, L., Marcus, D., Michalareas, G., Moeller, S., Oostenveld, R., Petersen, S.E., Prior, F.,  
1083 Schlaggar, B.L., Smith, S.M., Snyder, A.Z., Xu, J., Yacoub, E., Consortium, W.U.-M.H., 2012. The  
1084 Human Connectome Project: a data acquisition perspective. *Neuroimage* 62, 2222-2231.
- 1085 Wang, Y., Xu, Q., Luo, J., Hu, M., Zuo, C., 2019. Effects of Age and Sex on Subcortical Volumes. *Front*  
1086 *Aging Neurosci* 11, 259.
- 1087 Weiner, M.W., Veitch, D.P., Aisen, P.S., Beckett, L.A., Cairns, N.J., Cedarbaum, J., Green, R.C., Harvey,  
1088 D., Jack, C.R., Jagust, W., Luthman, J., Morris, J.C., Petersen, R.C., Saykin, A.J., Shaw, L., Shen, L.,  
1089 Schwarz, A., Toga, A.W., Trojanowski, J.Q., Alzheimer's Disease Neuroimaging, I., 2015. 2014

- 1090 Update of the Alzheimer's Disease Neuroimaging Initiative: A review of papers published since its  
1091 inception. *Alzheimers Dement* 11, e1-120.
- 1092 Winter, W., Sheridan, M., 2014. Previous reward decreases errors of commission on later 'No-Go' trials in  
1093 children 4 to 12 years of age: evidence for a context monitoring account. *Dev Sci* 17, 797-807.
- 1094 Xu, J., Moeller, S., Auerbach, E.J., Strupp, J., Smith, S.M., Feinberg, D.A., Yacoub, E., Ugurbil, K.,  
1095 2013. Evaluation of slice accelerations using multiband echo planar imaging at 3 T. *Neuroimage* 83,  
1096 991-1001.
- 1097 Yahata, N., Morimoto, J., Hashimoto, R., Lisi, G., Shibata, K., Kawakubo, Y., Kuwabara, H., Kuroda,  
1098 M., Yamada, T., Megumi, F., Imamizu, H., Nanez, J.E., Sr., Takahashi, H., Okamoto, Y., Kasai, K.,  
1099 Kato, N., Sasaki, Y., Watanabe, T., Kawato, M., 2016. A small number of abnormal brain  
1100 connections predicts adult autism spectrum disorder. *Nat Commun* 7, 11254.
- 1101 Yamashita, A., Yahata, N., Itahashi, T., Lisi, G., Yamada, T., Ichikawa, N., Takamura, M., Yoshihara, Y.,  
1102 Kunitatsu, A., Okada, N., Yamagata, H., Matsuo, K., Hashimoto, R., Okada, G., Sakai, Y.,  
1103 Morimoto, J., Narumoto, J., Shimada, Y., Kasai, K., Kato, N., Takahashi, H., Okamoto, Y., Tanaka,  
1104 S.C., Kawato, M., Yamashita, O., Imamizu, H., 2019. Harmonization of resting-state functional MRI  
1105 data across multiple imaging sites via the separation of site differences into sampling bias and  
1106 measurement bias. *PLoS Biol* 17, e3000042.
- 1107 Zhang, H., Schneider, T., Wheeler-Kingshott, C.A., Alexander, D.C., 2012. NODDI: practical in vivo  
1108 neurite orientation dispersion and density imaging of the human brain. *Neuroimage* 61, 1000-1016.
- 1109
